1 **Endothelial Rap1B mediates T-cell exclusion to promote tumor growth – a novel**  
2 **mechanism underlying vascular immunosuppression**

3  
4 **Running title:** Endothelial Rap1B mediates VEGF immunosuppression

5  
6 Guru Prasad Sharma<sup>a</sup>, Ramoji Kosuru<sup>a</sup>, Sribalaji Lakshmikanthan<sup>a</sup>, Shikan Zheng<sup>a</sup>, Yao Chen<sup>a</sup>,  
7 <sup>b</sup>, Robert Burns<sup>a</sup>, Gang Xin<sup>a</sup>, Weiguo Cui<sup>a, b</sup>, W. and Magdalena Chrzanowska<sup>a, c, d</sup>.

8  
9 <sup>a</sup>Blood Research Institute, Versiti, Milwaukee, Wisconsin

10 <sup>b</sup>Department of Microbiology and Immunology, Medical College of Wisconsin, Milwaukee,  
11 Wisconsin

12 <sup>c</sup>Department of Pharmacology and Toxicology, Medical College of Wisconsin, Milwaukee,  
13 Wisconsin

14 <sup>d</sup>Cardiovascular Center, Medical College of Wisconsin, Milwaukee, Wisconsin

15  
16 **Keywords:** tumor microenvironment, tumor blood vessels, vascular anergy, small GTPase  
17 Rap1, angiogenic signaling

18  
19 **Financial support:** This work was funded by NIH grant R01HL111582 (M.C.). W.C. is  
20 supported by American Cancer Society Research Scholar Grant. RK is supported by the  
21 Director's Fellowship Award at the Blood Research Institute of Versiti, Wisconsin.

22  
23  
24 **Corresponding Author:**

25 Magdalena Chrzanowska

26 ORCID id: 0000-0003-4182-2126

27 Blood Research Institute, Versiti, Milwaukee, Wisconsin 53201-2178

28 Department of Pharmacology and Toxicology, Medical College of Wisconsin, Milwaukee,  
29 Wisconsin 53226

30 tel: 414.937.3890

31 email: [mchrzanowska@versiti.org](mailto:mchrzanowska@versiti.org)

32  
33 **Conflict of interest disclosure:** The authors declare no potential conflicts of interest.

34  
35  
36

## 37 **Abstract**

38 Overcoming vascular immunosuppression: lack of endothelial cell (EC) responsiveness to  
39 inflammatory stimuli in the proangiogenic environment of tumors, is essential for successful  
40 cancer immunotherapy. The mechanisms through which Vascular Endothelial Growth Factor  
41 (VEGF) modulates tumor EC response to exclude T cells are not well understood. The goal was  
42 to determine the role of EC Rap1B, a small GTPase that positively regulates VEGF-  
43 angiogenesis during development, in tumor growth in vivo. Using mouse models of Rap1B  
44 deficiency, Rap1B<sup>+/-</sup> and EC-specific Rap1B KO (Rap1B<sup>iAEC</sup>) we demonstrate that EC Rap1B  
45 restricts tumor growth and angiogenesis. More importantly, EC-specific Rap1B deletion leads to  
46 an altered tumor microenvironment with increased recruitment of leukocytes and increased  
47 activity of tumor CD8<sup>+</sup> T cells. We find that tumor growth, albeit not angiogenesis, is restored in  
48 Rap1B<sup>iAEC</sup> mice by depleting CD8<sup>+</sup> T cells. Mechanistically, global transcriptome analysis  
49 indicated upregulation of the tumor cytokine, TNF- $\alpha$ , -induced signaling and NF $\kappa$ B  
50 transcriptional activity in Rap1B-deficient ECs. Functionally, EC Rap1B deletion led to  
51 upregulation of NF $\kappa$ B activity and enhanced Cell Adhesion Molecules (CAMs) expression in  
52 TNF- $\alpha$  stimulated ECs. Importantly, CAM expression was upregulated also in tumor ECs from  
53 Rap1B<sup>iAEC</sup> mice, vs. controls. Significantly, deletion of Rap1B abrogated VEGF  
54 immunosuppressive downregulation of CAM expression, demonstrating that Rap1B is essential  
55 for VEGF-suppressive signaling. Thus, our studies identify a novel endothelial-endogenous  
56 mechanism underlying VEGF-dependent desensitization of EC to pro-inflammatory stimuli.  
57 Significantly, they identify EC Rap1 as a potential novel vascular target in cancer  
58 immunotherapy.

59

60

61

## 62 Introduction

63 Recent cancer immunotherapies involving immune checkpoint inhibitors and chimeric  
64 antigen receptor (CAR)-T cell transfer show promise for cancer treatments. These treatments  
65 exploit the complex interactions between cancer cells and host tissue in tumor  
66 microenvironment (TME), which determine tumor growth and metastasis. Understanding the  
67 mechanisms of the host immune response to the tumor is, therefore, critical to the success of  
68 immunotherapy (Hendry et al., 2016).

69 Tumor vasculature is a key component of the TME. In response to hypoxia and  
70 proangiogenic cytokines, endothelial cell (EC)-driven angiogenesis gives rise to vessels that  
71 supply blood to feed the tumor. Moreover, tumor ECs control the TME by regulating leukocyte  
72 trafficking and modulating the immune response. The density of tumor-infiltrating T cells, and, in  
73 particular, CD8<sup>+</sup> cytotoxic T cells, correlates with improved survival in many tumors (Fridman et  
74 al., 2012). Thus, the success of adoptive T-cell therapies to treat solid cancers depends on  
75 successful homing and infiltration by T-lymphocytes (Ager et al., 2016).

76 Endothelial cells control leukocyte trafficking by upregulating ligands for T-cell adhesion,  
77 among them Cell Adhesion Molecules (CAMs): VCAM-1 and ICAM-1, as a response to the  
78 proinflammatory cytokines in the TME (Ley et al., 2007). While essential for leukocyte  
79 recruitment, the proangiogenic environment in tumors dampens this response. Clinical data and  
80 experimental studies in mice suggest that tumor blood vessels are anergic to inflammatory  
81 stimuli and the recruitment of cytotoxic CD8<sup>+</sup> T cells (Ager et al., 2016; Joyce and Fearon,  
82 2015), as demonstrated in a number of tumors, including melanoma (Hendry et al., 2016).  
83 Endothelial anergy – lack of responsiveness to inflammatory stimuli (Griffioen et al., 1996) is, in  
84 part, due to elevated angiogenic factors. In particular, VEGF-A from various TME components is  
85 upregulated in solid tumors (VEGF expression correlates with poor prognosis). VEGF  
86 decreases EC responsiveness to proinflammatory cytokines and proinflammatory adhesion  
87 receptor expression, suppressing leukocyte recruitment (Piali et al., 1995). Specifically, VEGF  
88 blocks TNF- $\alpha$  induced NF- $\kappa$ B required for CAM expression and T-cell infiltration (Huang et al.,  
89 2015). This concept is supported by evidence from anti-angiogenic therapies leading to  
90 upregulation of adhesion molecules on tumor vasculature and increased leukocyte infiltration  
91 (Dirkx et al., 2006; Hendry et al., 2016). Interference with VEGF signaling normalizes tumor  
92 vasculature and restores responsiveness of ECs to adoptive T-cell therapy also in melanoma  
93 (Shrimali et al., 2010). However, incomplete understanding of the mechanisms through which  
94 VEGF modulates tumor EC response to exclude T cells (cytokine-induced CAM expression),  
95 constitutes a major obstacle in overcoming immunosuppressive properties of tumor ECs.

96 Two closely related isoforms of a ubiquitously expressed small GTPase Rap1, Rap1A and  
97 Rap1B, are best known for modulation of adhesive and signaling properties of integrins and  
98 cadherins (Boettner and Van Aelst, 2009). In endothelium, Rap1 isoforms are required for  
99 vessel stabilization during development, but are not essential for vessel maintenance after birth.  
100 Instead, both isoforms are positive regulators of developmental angiogenesis (Carmona et al.,  
101 2009; Chrzanowska-Wodnicka et al., 2008; Yan et al., 2008). In particular, Rap1B, the  
102 predominant Rap1 isoform in the endothelium, promotes VEGF-induced VEGFR2 activation and  
103 signaling and its deficiency impairs VEGF-induced angiogenic responses (Chrzanowska-  
104 Wodnicka, 2010). Interestingly, Rap1B is also essential for normal VEGF-induced EC barrier  
105 dissolution and its deficiency prevents VEGF-mediated hyperpermeability in a diabetes model in  
106 vivo (Lakshmikanthan et al., 2018). Thus, there exist synergy between Rap1 and VEGF  
107 signaling. However, the role of Rap1B in tumor vasculature has not been studied and its  
108 involvement in mechanisms through which VEGF modulates tumor EC responses is unknown.

109 In this study our goal was to determine whether endothelial Rap1B regulated tumor growth  
110 in vivo. We hypothesized that Rap1B deficiency would lead to impaired tumor growth by  
111 restricting angiogenesis. We found that, beyond restriction of vessel growth, endothelial Rap1B  
112 deficiency led to increased leukocyte recruitment and leukocyte activation. Unexpectedly,  
113 deletion of CD8<sup>+</sup> T cells rescued impaired tumor growth in EC-specific Rap1B knockout mice  
114 (Rap1B<sup>ΔEC</sup>), without normalizing endothelial cell number. At the molecular level, Rap1B  
115 deficiency increased EC responsiveness to TME-associated cytokine, TNF $\alpha$ , leading to  
116 increased T-cell adhesion. Transcriptomic analysis indicated the significant upregulation of  
117 TNF $\alpha$  signaling pathways and NF $\kappa$ B transcription, including proinflammatory CAM expression.  
118 Importantly, CAM expression was upregulated in tumor ECs from Rap1B<sup>ΔEC</sup> mice. Strikingly,  
119 Rap1-deficiency prevented the VEGF-induced inhibition of ECs' proinflammatory response. Our  
120 results demonstrate that Rap1B plays an important role in VEGF modulation of EC response in  
121 TME, acting predominantly as a suppressor of proinflammatory response. Our findings also  
122 suggest inhibition of endothelial Rap1B signaling as a novel target in overcoming endothelial  
123 anergy in tumor therapy.

124

## 125 **Materials and Methods**

### 126 **In vivo mouse tumor model**

127 All mouse procedures were performed according to the protocol approved by Medical College of  
128 Wisconsin Institutional Animal Use and Care Committee. Generation of total Rap1B knockout  
129 (Rap1B<sup>-/-</sup>) mice and endothelial cell (EC)-specific Rap1B-knockout mice (Cdh5(PAC)-

130 CreERT2<sup>+0</sup>; Rap1A<sup>+/+</sup> Rap1B<sup>ff</sup>; Rap1B<sup>iAEC</sup>) has been previously described (Chrzanowska-  
131 Wodnicka et al., 2005; Lakshmikanthan et al., 2015). Global *Rap1B* gene heterozygous mice  
132 (*Rap1B*<sup>+/-</sup>; C57Bl/6), in which Rap1B expression is decreased to ~50% of *Rap1B*<sup>+/+</sup> (WT, control  
133 mice), generated by crossing male *Rap1B*<sup>-/-</sup> and female WT mice used for analysis of Rap1B-  
134 deficiency on tumor growth because of high degree of lethality of total Rap1B knockout mice  
135 (*Rap1B*<sup>-/-</sup>). Cdh5-Cre-negative mice, or mice injected with carrier oil only were used as controls  
136 for Rap1B<sup>iAEC</sup> mice. Both males and females between the ages of 8 and 20 weeks were used in  
137 the study. Melanoma tumors were developed with subcutaneously implanted B16F10 cells (2 ×  
138 10<sup>5</sup> in 100µl PBS) into the flank area. Tumor growth was monitored using microcallipers every  
139 other day for till harvest on day 15<sup>th</sup>, when mice were killed, tumors isolated, weighed and  
140 processed for flow cytometry analysis. For CD8<sup>+</sup>-T cell depletion, tumor bearing mice were  
141 treated with purified anti-mouse CD8 mAb (clone 53-6.7), or control mAb (clone 2A3) injected  
142 intraperitoneally to mice on days 0, 2 and 9 (Figure 3A). The efficiency of CD8<sup>+</sup> T cell depletion  
143 was determined in tumors, blood, bone marrow and spleen by flow cytometry and by  
144 hematological analysis.

#### 145 **Cell lines and treatments**

146 All cells lines were obtained from ATCC. B16F10 mouse melanoma cells were cultured in  
147 Roswell Park Memorial Institute (RPMI) medium supplemented with 0.1 mM nonessential amino  
148 acids, 1 mM sodium pyruvate, 2 mM l-glutamine, 25 mM HEPES, 55 µM 2-mercaptoethanol,  
149 10% FCS and 1% penicillin-streptomycin (100 U/ml penicillin and 100 µg/ml streptomycin).  
150 Human umbilical vein endothelial cells (HUVEC) cultured in endothelial growth medium (EGM-2,  
151 Lonza, UK) for fewer than 5 passages were used in all experiments. Human T cell leukemia cell  
152 line, Jurkat E6-1, were cultured in RPMI media supplemented with 10% FCS and 1% penicillin-  
153 streptomycin. All cells were maintained in a humidified 5% CO<sub>2</sub> incubator at 37 °C. 40-50%  
154 confluent HUVEC monolayers were transfected with 50nM Rap1B siGENOME siRNA pool or  
155 with non-targeting siRNA pool (Dharmacon) for 6h in OPTIMEM, and cultured for an additional  
156 30 hours in a complete EBM culture medium. Knockdown efficiency was assessed by Western  
157 blotting. For T-cell adhesion assay, RNA sequencing and analysis of CAM expression, siRap1B  
158 or siControl-transfected HUVECs were treated with 50nM TNF-α (2% FBS EBM basal medium)  
159 for 12 hrs, prior to lysis as described below. For analysis of VEGF-induced suppression of CAM  
160 expression, cells were simultaneously treated with 50 ng/ml VEGF, as previously described  
161 (Huang et al., 2015).

162

## 163 **Tumor cell analysis by flow cytometry**

164 Single-cell suspensions of tumors and peripheral organs were prepared in flow cytometry  
165 staining buffer (2% FCS + 1 mM EDTA in PBS), as follows. Tumors were digested in RPMI  
166 1640 (Lonza) supplemented with 0.6 mg ml<sup>-1</sup> collagenase type I (Worthington 4196), 0.1 mg  
167 ml<sup>-1</sup> Type IV bovine pancreatic DNase (Sigma-Aldrich) and 1M MgCl<sub>2</sub> (Sigma) for 45 min at 37  
168 °C, passed through a 70 µm cell strainer and subjected to red blood cell lysis and filtration. A  
169 single-cell suspension of the spleen was obtained by tissue mincing in staining buffer. Bone  
170 Marrow (BM) cells were isolated by flushing femur and tibia bones in staining buffer and filtering  
171 through a 70µm nylon mesh. Peripheal blood monocytic cells (PBMCs) from whole blood were  
172 isolated by Histopaque gradient method. RBCs were removed using ACK lysis buffer (Lonza).  
173 The equal number of cells for each sample were stained with specific directly conjugated  
174 monoclonal antibodies (Supplemental Table 1), as previously described (Xin et al., 2020).  
175 Controls were stained with IgG isotype-matched control mAbs. 7-AAD dye (Sigma) was used to  
176 differentiate live and dead cells. Intracellular granzyme B and INF $\gamma$  staining was performed in  
177 cells that had fixed and permeabilized in Flow Cytometry Fixation and Permeabilization Buffers  
178 (Catalog numbers FC004, FC005, R&D systems) following manufacturer's protocol. Stained  
179 samples were analyzed on an LSR II flow cytometer (BD Biosciences) or MACSQuant Analyzer  
180 10 (Miltenyi). The compensation was set up for all the colors used in the experiment. Data were  
181 analyzed with the FlowJo software (FlowJo LLC, version 10.0.7). Cellular debris and doublets  
182 were removed using viability dye and FSC-A FSC-H gating.

## 183 **RNA sequencing**

184 siRap1B- or siControl-transfected HUVECs, cultured in growth media (EGM-2, Lonza) were  
185 treated with TNF- $\alpha$  for 12 hours. For each biological replicate RNA was extracted from 3 x 10<sup>5</sup>  
186 cells grown in parallel dishes using TRIzol™ reagent. RNA quantity and quality were assessed  
187 by Agilent high sensitivity RNA-Tape Station. RNA-seq libraries were prepared using a modified  
188 SMART-Seq2 protocol (Picelli et al., 2014) and sequenced on Illumina NextSeq 500 sequencer  
189 using a high-output V2 75 cycle kit (Illumina) in 37 bp paired-end mode. Reads were pseudo-  
190 aligned to the human transcriptome (Ensembl GRCh38 release 102) and expression was  
191 quantified using Salmon v1.3.0 (Patro et al., 2017). DESeq2 v 1.26.0 Wald tests were used to  
192 determine whether gene expression fold changes were significantly different from zero (Love et  
193 al., 2014). For heatmap visualization, data were transformed using the regularized logarithmic  
194 transformation (Love et al., 2014). Pre-ranked gene set enrichment analyses (GSEA) were  
195 conducted using DESeq2 shrunken fold-changes and fgsea v1.12.0. The KEGG (Ogata et al.,



196 1999), Reactome (Fabregat et al., 2018) and MSigDB C3:TFT (transcription factor targets)  
197 (Liberzon et al., 2011) databases were used for GSEA (Subramanian et al., 2005). The  
198 Benjamini-Hochberg method was used to adjust p-values for false-discovery in both differential  
199 expression and GSEA analysis (Benjamini and Hochberg, 1995). Data were deposited within  
200 NCBI GEO, Accession ID: GSE186046.

### 201 **NFκB activity assay**

202 HUVECs were plated onto 6-well plates at a density of  $5 \times 10^5$  cells/well and transfected with 50  
203 nM Rap1B siGENOME siRNA pool or with non-targeting siRNA pool (Dharmacon) for 6 hr in  
204 OPTIMEM, and cultured for an additional 18 hr in a complete EBM culture medium. After 24 hr,  
205 siControl and siRap1B cells were infected with NFκB reporter construct pNL3.2.NFκB-  
206 RE[NlucP/NF-κB-RE/Hygro] Vector (Promega) using LipofectAMINE-2000, according to the  
207 manufacturer's protocol. pNL3.2.CMV Vector (Promega) was used as a negative control for  
208 experiments to measure regulated changes in NanoLuc® luciferase expression levels. After a  
209 total of 36 hr transfection, cells were trypsinized and seeded in 96-well plates at a density of 3 or  
210  $5 \times 10^3$  cells/well and cultured overnight in a complete EBM culture medium. Following day, cells  
211 were treated with TNF-α (20 ng/ml) or vehicle (PBS) for 5 hrs. Luciferase activity was measured  
212 using the Nano-Glo® Luciferase Assay System (Promega) with an EnSpire Multimode Plate  
213 Reader (PerkinElmer), and normalized to cell number. A representative of three independent  
214 experiments, each performed in sextuplicate, is depicted as mean fold induction vs. non-  
215 stimulated cells (PBS) (Gu et al., 2016; Seigner et al., 2019).

### 216 **Adhesion assay**

217 For quantitative assessment of T-cell adhesion to activated endothelium, we adapted previously  
218 published protocol (Wilhelmsen et al., 2013). Briefly, siRap1B or siControl-transfected HUVEC  
219 monolayers were treated with 50nM TNF-α (2% FBS EBM basal medium) for 12 hrs. Jurkat T  
220 cells were washed once with PBS and incubated in serum-free the RPMI-1640 medium with  
221 5uM Calcein-AM (BD Biosciences-US) at 37 °C for 30 minutes. The stained Jurkat T cells were  
222 washed with PBS, and co-cultured with the TNF-α-treated HUVECs (1:1) for 45 min at 37 °C.  
223 Non-adherent Jurkat cells were removed by washing thrice with PBS. Calcein-AM fluorescence  
224 of EC-adhered Jurkat cells was immediately read on a fluorescence plate reader (Perkin Elmer  
225 EnSpire 2300) at 495/515 nm. Adhesion efficiency was calculated as a ratio of number of T cells  
226 bound per 10,000 cells plated.

227

## 228 **Western blotting**

229 For determination of CAM expression, siRap1B or siControl-transfected HUVECs were treated  
230 with 50nM TNF- $\alpha$  (2% FBS EBM basal medium) for 12 hrs. Following completion of adhesion  
231 assay, cells were lysed in RIPA cell lysis buffer (100mM Tris-HCl buffer (pH 7.4), 0.150M NaCl,  
232 0.001M EDTA, 1% NP-40, 1% deoxycholic acid 0.1% SDS) with 2mM sodium orthovanadate  
233 and 1X protease/ phosphatase inhibitor cocktail. Cell lysates were clarified by centrifugation and  
234 protein concentration was determined PierceTMBCA protein assay kit (Thermo Scientific).  
235 Samples containing equal amount of protein were resolved on 4-12% gradient SDS-PAGE gels  
236 and transferred to PVDF membranes. PVDF membrane was blocked in 5% skim milk/(PBS and  
237 0.05% Tween 20) for 1 hour at RT and probed with primary antibodies against VCAM-1 (Rabbit  
238 mAb #13662) and Rap1 (Rabbit mAb #2399), both Cell Signaling Technology), and  $\beta$ -actin (C4:  
239 sc-47778, Santa Cruz Biotechnology) overnight at 4<sup>o</sup>C. Membranes were washed and incubated  
240 with horseradish peroxidase (HRP)-conjugated goat-anti-rabbit or donkey-anti mouse secondary  
241 antibodies for 1h at room temperature followed by chemiluminescence detection using ECL  
242 substrate (Pierce) and imaged using Amersham Imager 600 (GE Healthcare). Densitometric  
243 band intensity was determined using Amersham Imager 600 analysis software.

244

## 245 **Statistical analysis**

246 Sample sizes were calculated based on variability in our and others' previous studies. Animals  
247 were assigned to specific experimental groups without bias. When possible, subject  
248 randomization was achieved by distributing experimental groups across multiple cages and  
249 litters, as well as blinding during data collection and analysis to remove experimenter's bias.  
250 Graphs were generated and statistical analyses performed using GraphPad Prism version 9  
251 (GraphPad Software). Graphs were represented as mean values and standard error of mean  
252 (S.E.M.). Student's t-test with Welch's correction was used to measure statistical significance  
253 between groups. For comparisons of more than two groups, one-way analysis of variance  
254 (ANOVA) with Tukey's multiple comparisons post hoc test was used. \* p<0.05; \*\* p<0.01; \*\*\*  
255 p<0.001

256

## 257 **Results**

### 258 **Endothelial Rap1B deletion blocks tumor growth and impairs tumor vascularization.**

259 To assess the effect of Rap1B-deficiency on tumor growth we used B16F10 melanoma model.  
260 Rap1B<sup>+/+</sup> and Rap1B<sup>+/-</sup> mice were each injected with 2x10<sup>5</sup> B16F10 melanoma cells and tumor



261 size was monitored until harvested for analysis on day 15 (Figure 1A). The tumor size was  
262 significantly smaller in Rap1B<sup>+/-</sup> mice, starting on day 8 after inoculation (Figure 1B, D). The final  
263 tumor weight was also decreased in Rap1B<sup>+/-</sup> mice compared to the wild-type control mice  
264 (Figure 1C). To determine the extent of endothelial Rap1B contribution to tumor growth, we  
265 examined melanoma growth in EC-specific Rap1B knockout (Rap1B<sup>iAEC</sup>) and Cdh5-Cre-  
266 negative control mice. Similar to total Rap1B depletion, endothelial deletion of Rap1B led to  
267 decreased tumor growth (Figure 1E) and decreased final weight and size of tumors (Figure 1F,  
268 G). Thus, these results suggest that the endothelial Rap1B significantly contributes to tumor  
269 growth.

270 Rap1B positively regulates developmental angiogenesis by promoting EC migration and  
271 proliferation (Carmona et al., 2009; Chrzanowska-Wodnicka et al., 2008). Thus, we next  
272 examined whether EC Rap1B-deficiency impaired tumor growth by decreasing  
273 neovascularization of tumors. Tumors were excised, digested with collagenase-dispase and  
274 endothelial compartment was quantitatively assessed in CD31 (PECAM-1)-positive and CD45-  
275 negative stained cells by flow cytometry (Figure 1 – figure supplement 1A, B). We found  
276 significantly decreased number of ECs/ per tumor weights in tumors from Rap1B<sup>iAEC</sup> mice,  
277 compared to control mice (Figure 2A). A similar result was obtained in tumors from Rap1B<sup>+/-</sup> vs.  
278 control mice (Figure 1 – figure supplement 1C). Endothelial identity of the CD31-positive cells  
279 was further examined by immunohistochemistry in the tumor (Figure 1 – figure supplement 1D).  
280 Similar to the flow cytometry results, there was a significant decrease in CD31-positive cells in  
281 vascularized area in the tumor sections from Rap1B-deficient mice (Figure 1 – figure  
282 supplement 1E). These findings indicate that Rap1B-deficiency leads to impaired tumor  
283 endothelial cell endowment.

#### 284 **Endothelial Rap1B deletion leads to increased T-cell infiltration and adhesion to ECs.**

285 Tumor ECs-driven angiogenesis supports tumor growth by providing blood flow to the ischemic  
286 tissue. Moreover, tumor ECs actively control leukocyte infiltration and activation states. To  
287 determine if the reduced tumor growth in Rap1B<sup>iAEC</sup> mice is due to impaired angiogenesis or  
288 another aspect of endothelial function altered in the absence of Rap1B, we quantitatively  
289 characterized immune cells from TME in control and Rap1B<sup>iAEC</sup> mice. Single-cell suspensions  
290 from tumors from Rap1B<sup>iAEC</sup> and control mice were stained with lymphoid and myeloid cell  
291 markers and examined by flow cytometry (Figure 2 – figure supplement 1A). Interestingly, we  
292 found that EC-Rap1B deficiency led to quantitative changes in the TME cellularity (Figure 2 –  
293 figure supplement 1B-F). Specifically, the number of infiltrated CD45<sup>+</sup> leukocytes (Figure 2B),

294 and in particular, CD4<sup>+</sup> (Figure 2C) and CD8<sup>+</sup> (Figure 2D) T cells were increased in tumors from  
295 Rap1B<sup>iAEC</sup> mice. To assess the effect of EC Rap1 deletion on CD45 activation, we examined  
296 surface expression of CD44, a cell-surface glycoprotein involved in cell-cell interactions and a  
297 marker of T cell activation (Graham et al., 2007) in Rap1B<sup>iAEC</sup> and control tumors. We found  
298 CD44 expression was significantly upregulated in CD4<sup>+</sup> (Figure 2E) and CD8<sup>+</sup> T-cells (Figure  
299 2F) from Rap1B<sup>iAEC</sup> mice. To further assess the level of T-cell activation, we examined  
300 intracellular expression of T-cell activation marker granzyme B (GrB) (Kelso et al., 2002).  
301 Consistently with increased T cell activation, we found increased number of GrB<sup>+</sup> CD8<sup>+</sup> T cells in  
302 tumors from Rap1B<sup>iAEC</sup>, vs. control mice (Figure 3G, H). Thus, EC-specific Rap1B knockout  
303 leads to decreased ECs in tumors, but increased leukocyte infiltration and increased leukocyte  
304 activity.

### 305 **Depletion of CD8<sup>+</sup> T cells rescues tumor growth in Rap1B<sup>iAEC</sup> mice**

306 Increased presence of CD8<sup>+</sup> cytotoxic T cells is associated with reduced tumor growth (Ager et  
307 al., 2016; Joyce and Fearon, 2015). Our results showing increased leukocyte activation and  
308 recruitment to tumors in Rap1B<sup>iAEC</sup> mice suggested endothelial Rap1B might control tumor  
309 growth by restricting CD8<sup>+</sup> T cell recruitment and activation. To determine if increased CD8<sup>+</sup>-T-  
310 cell activity/infiltration was responsible for suppressed tumor growth in Rap1B<sup>iAEC</sup> mice, we  
311 examined the effect of CD8<sup>+</sup> T-cell depletion *in vivo* on tumor growth and TME cellularity in  
312 Rap1B<sup>iAEC</sup> and control mice (Figure 3A). Injection of anti-CD8 $\alpha$  monoclonal antibody (mAb),  
313 successfully depleted CD8<sup>+</sup> T cells (Figure 3B), but not CD4<sup>+</sup> T cells (Figure 3 – figure  
314 supplement 1A) in tumors from control and Rap1B<sup>iAEC</sup> mice. CD8<sup>+</sup> T cells were also depleted in  
315 other tissue compartments (blood, spleen and bone marrow, Figure 3 – figure supplement 2).  
316 Consistent with T-cell depletion, the overall number of CD45<sup>+</sup> cells was also decreased (Fig. 3F,  
317 Figure 3 – figure supplement 3). Interestingly, we found that the anti-CD8 $\alpha$  Ab treatment did not  
318 lead to decreased tumor growth in control mice, compared to mice treated with isotype control  
319 mAb (Figure 3C). This further supports the view that in endothelial Rap1 restricts CD8<sup>+</sup> T cells'  
320 effector function and tissue homing in this aggressive melanoma mouse model. In contrast, anti-  
321 CD8 $\alpha$  mAb injection restored tumor growth in Rap1B<sup>iAEC</sup> mice to the level of control mice (Fig.  
322 3C, Figure 3 – figure supplement 4).

323 We considered a possibility that restored tumor growth in Rap1B<sup>iAEC</sup> mice upon depletion of  
324 CD8<sup>+</sup> T cell may be via increased angiogenesis (increased EC endowment) rather than altering  
325 of CD8<sup>+</sup> T cell -EC interactions. To this end, we examined EC endowment in tumors from  
326 control and Rap1B<sup>iAEC</sup> mice (Figure 3D). Although CD8<sup>+</sup> T-cell depletion did not retard tumor

327 growth in normal mice, it resulted in a significant decrease in the number of tumor ECs,  
328 compared to isotype control mAb-injected mice (Figure 3E). This suggests that in control  
329 tumors, EC number is not a tumor growth-limiting factor. Interestingly, depletion of CD8<sup>+</sup> T cells  
330 lead to a small, but significant elevation of ECs numbers in tumors in Rap1B<sup>iAEC</sup> mice (Figure  
331 3E), albeit to a level lower than in WT IgG controls. These results show that restored tumor  
332 growth in Rap1B<sup>iAEC</sup> mice is not likely due to improved angiogenesis, but rather inhibition of  
333 increased CD8<sup>+</sup> T cell activity upon deletion of Rap1B from endothelium.

### 334 **Rap1B suppresses TNF $\alpha$ -induced NF $\kappa$ B transcription and signaling.**

335 To gain insights into the mechanism through which Rap1B regulates the observed increased  
336 leukocyte recruitment and activity, we analyzed the global effects of the TME-associated  
337 cytokine, TNF- $\alpha$  treatment on gene expression in siRap1B and siControl ECs by bulk RNA  
338 sequencing. Principle component and differential gene expression analyses showed that  
339 siRap1B ECs exhibited a distinct transcriptional profile compared to siControl ECs (Figure 4 –  
340 figure supplement 1A, B). To assess the TNF- $\alpha$ -induced changes in ECs upon Rap1B  
341 knockdown, we conducted gene set enrichment analysis (GSEA) using gene sets from the  
342 Reactome database. This analysis revealed upregulation of genes in the TNF- $\alpha$  signaling  
343 pathway in siRap1B ECs (Figure 4A, B). Furthermore, the transcriptional profile was consistent  
344 with upregulation of NF $\kappa$ B transcriptional activity in siRap1B cells (Figure 4C, D and Figure 4 –  
345 figure supplement 1C, D). To examine the effect of Rap1B deletion on NF $\kappa$ B activity in ECs,  
346 siControl and siRap1B HUVECs were transfected with a NF $\kappa$ B-driven luciferase reporter  
347 plasmid or a control, empty plasmid, and emitted luminescence was measured after 5h cell  
348 exposure to TNF- $\alpha$  (20 ng/ml). TNF- $\alpha$  induced a modest, but significant luminescence increase  
349 in siControl ECs, vs. PBS (Figure 4E). Strikingly, TNF- $\alpha$  induced luminescence was significantly  
350 higher in siRap1B ECs (Figure 4E). Consistently with increased NF $\kappa$ B activity, GSEA revealed  
351 upregulation of NF $\kappa$ B targets (Figure 4F).

352 Notably, among NF $\kappa$ B-regulated genes upregulated in siRap1B ECs were  
353 proinflammatory Cell Adhesion Molecules (CAM)s; ICAM-1 and VCAM-1 (Figures 4B and F,  
354 asterisks). To validate these RNAseq data, we examined the effect of TNF- $\alpha$  on CAM protein  
355 expression in siRap1B and siControl ECs. TNF- $\alpha$  treatment led to a significant upregulation of  
356 VCAM-1 (Figure 5A) and ICAM-1 (Figure 5– figure supplement 1A) in control ECs.  
357 Interestingly, and consistent with increased transcript expression, TNF- $\alpha$ -induced CAM protein  
358 expression was significantly enhanced in Rap1B-deficient ECs (Figure 5A, Figure 5– figure  
359 supplement 1A). These findings show that in isolated ECs deletion of Rap1B leads to

360 upregulation of CAMs via upregulation of NF $\kappa$ B signaling in response to TME cytokine, TNF- $\alpha$ .  
361 Importantly, we found that, similarly to the *in vitro* effect, EC-Rap1B deletion mice led to  
362 elevated expression of VCAM (Figure 5B, C) and ICAM-1 (Figure 5– figure supplement 1B) in  
363 tumor ECs from Rap1B<sup>i $\Delta$ EC</sup> vs. control mice. Thus, both *in vitro* and *in vivo*, EC Rap1B restricts  
364 CAM expression in response to a TME-associated cytokine.

365 EC-controlled expression of CAMs on EC surface controls leukocyte infiltration into  
366 tumors, by promoting leukocyte adhesion via integrins on leukocytes and CAMs on  
367 endothelium. To determine if increased adhesion to Rap1B-deficient endothelium may  
368 contribute to increased tumor infiltration, we measured the effect of TNF- $\alpha$  on leukocyte  
369 adhesion in Rap1B-deficient and WT ECs (Wilhelmsen et al., 2013) (Figure 5D). A 24-hour  
370 treatment with TNF- $\alpha$  led to a significant increase in leukocyte adhesion in control cells (Figure  
371 5E). However, the number of leukocytes adhering to ECs was significantly increased upon  
372 Rap1B knockdown (Figure 5E), supporting our hypothesis that deletion of Rap1B in EC  
373 promotes EC-leukocyte interactions. In sum, underlying increased T-cell infiltration into  
374 Rap1B<sup>i $\Delta$ EC</sup> tumors is elevated EC inflammatory NF $\kappa$ B activation and CAM expression, which  
375 leads to increased adhesion and activation of leukocytes.

### 376 **Endothelial Rap1B mediates immune suppression in the VEGF pathway**

377 In addition to stimulating EC angiogenic responses, VEGF promotes tumor growth by  
378 dampening EC responsiveness to proinflammatory cytokines and proinflammatory adhesion  
379 receptor expression, suppressing leukocyte recruitment. Because Rap1B is a positive regulator  
380 of VEGF-mediated angiogenic responses (Chrzanowska-Wodnicka, 2010; Lakshmiathan et  
381 al., 2011), we hypothesized Rap1B may mediate VEGF-induced suppression of EC pro-  
382 inflammatory responses. To test this hypothesis, we examined the effect of Rap1B knockdown  
383 on VEGF-mediated modulation of VCAM-1 expression. Consistent with previous reports (Huang  
384 et al., 2015), TNF- $\alpha$ -induced VCAM-1 expression was largely inhibited in the presence of VEGF  
385 (Fig. 5F). Strikingly, this inhibitory effect of VEGF was abolished in siRap1B ECs, where VEGF  
386 failed to reduce TNF- $\alpha$ -induced VCAM-1 expression (Figure 5F). Therefore, Rap1B is an  
387 essential component of the VEGF signaling that modulates EC response to proinflammatory  
388 cytokines. Our findings suggest Rap1B may be a key EC signaling component mediating tumor  
389 EC energy (vasosuppression).

390

## 391 Discussion

392 Overcoming vascular immunosuppression - reduced EC responsiveness to inflammatory  
393 stimuli - is essential for successful cancer immunotherapy. In this manuscript we demonstrate  
394 Rap1B is a key EC component restricting endothelial proinflammatory response. We show that  
395 EC Rap1B is permissive for tumor growth, as its EC deficiency suppresses tumor growth and  
396 angiogenesis. Perhaps more importantly, the deletion of Rap1B leads to altered TME, increased  
397 leukocyte recruitment, and, in particular, increased activity of tumor CD8<sup>+</sup> T cells. We find that  
398 tumor growth, albeit not angiogenesis, is restored in Rap1B<sup>ΔEC</sup> mice by depleting CD8<sup>+</sup> T cells.  
399 Therefore, the key function of Rap1B in tumor ECs is to control leukocyte, and specifically CD8<sup>+</sup>  
400 T cell interactions. Mechanistically, we show that Rap1B deletion leads to upregulation of the  
401 TNF-α signaling and cytokine-induced NFκB transcriptional activity. Specifically, EC Rap1B  
402 restricts proinflammatory cytokine-induced upregulation of CAMs on ECs and EC-leukocyte  
403 interactions *in vitro* and in tumor ECs, *in vivo*. Importantly, in the proangiogenic environment  
404 present in tumors, Rap1B is essential for mediating VEGF-immunosuppressive signaling, as  
405 Rap1-deficiency inhibits VEGF-mediated inhibition of CAM expression. Thus, our studies  
406 identify a novel EC-endogenous mechanism underlying VEGF-dependent desensitization of  
407 ECs to proinflammatory stimuli. Significantly, they identify EC Rap1B as a potential novel  
408 vascular adoptive cell therapy target.

409 Increased angiogenic factors in TME are linked with tumor progression and tumor  
410 vasculature has been a target of anti-tumor therapies (Ferrara and Adamis, 2016; Hendry et al.,  
411 2016). Anti-angiogenic therapies block vessel growth, normalize vascular permeability and  
412 promote the recruitment of pericytes to stabilize blood flow. Importantly, they sensitize anergic  
413 tumor endothelial cells to proinflammatory stimuli, induce proinflammatory expression program  
414 which promotes tumor-infiltrating T cells, a positive are prognostic for patient outcome in  
415 multiple cancers (Fridman et al., 2012). VEGF is the most prominent tumor angiogenic factor  
416 and a number of anti-VEGF therapies have been approved for treatment of cancer (Joyce and  
417 Fearon, 2015). However, anti-VEGF therapies lead to adverse effects (tumor aggressiveness,  
418 increased metastasis (Ebos et al., 2009; Pàez-Ribes et al., 2009). Moreover, while molecular  
419 pathways underlying VEGF-induced vessel formation have been intensely investigated, the  
420 mechanism through which VEGF modulates immune responses of tumor vessels remains  
421 poorly understood.

422 The findings described in this manuscript provide novel molecular insights into the molecular  
423 underpinnings of VEGF-induced immunosuppression. Previous studies implicated Rap1B

424 developmental angiogenesis (Chrzanowska-Wodnicka, 2013) and demonstrated that Rap1B  
425 controls multiple aspects of EC angiogenic responses to VEGF (Chrzanowska-Wodnicka,  
426 2010). More recent, molecular studies demonstrated Rap1 acts as an upstream, positive  
427 regulator of VEGFR2 signaling important for shear stress sensing and NO release from ECs  
428 (Lakshmikanthan et al., 2015), and VEGF-induced vascular permeability (Lakshmikanthan et al.,  
429 2018). Consistently with that model, EC-Rap1B deficiency attenuates VEGF-induced  
430 permeability *in vivo* and protects from VEGF-induced hyperpermeability in a diabetes model  
431 (Lakshmikanthan et al., 2018). Here, we demonstrate, for the first time, to our knowledge, that  
432 Rap1 is essential for VEGF-induced inhibition of the proinflammatory response. While the exact  
433 molecular mechanisms need to be elucidated, our findings place Rap1B at the crossroads of  
434 VEGFR2 and cytokine signaling, essential for control of tumor growth (Fig. 6).

435 An unbiased transcriptomics approach provided a novel, global view of pathways controlled  
436 by Rap1B (Figure 4 and Figure 4 – figure supplement 1). The top pathway upregulated in the  
437 absence of Rap1B is the NFκB -mediated proinflammatory response. Deletion of Rap1B leads  
438 to upregulation of NFκB targets, including CAM receptors, both: *in vitro* and in tumor ECs *in*  
439 *vivo*. Interestingly, Rap1B deletion also leads to upregulation of CAMs in a mouse  
440 atherosclerosis model (Singh et al., 2021). Additional NFκB proinflammatory targets likely  
441 contribute to the increased leukocyte infiltration and leukocyte infiltration in Rap1B<sup>iAEC</sup> tumors,  
442 and warrant further investigation. The analysis of Rap1B<sup>iAEC</sup> TME cellularity revealed that EC  
443 Rap1B-deficiency selectively affected other leukocyte populations; in particular the number of  
444 some tumor B cells was increased in Rap1B<sup>iAEC</sup> tumors vs. controls (Figure 2 - figure  
445 supplement 1D, E). Future studies will determine whether these effects are primary or  
446 secondary. Nonetheless, our findings support Rap1B as a key regulator of EC-leukocyte  
447 interactions via a novel mechanism involving suppression of proinflammatory signaling. These  
448 results also reveal a new aspect of Rap1 biology in endothelium. Future studies will focus on the  
449 mechanisms of transcriptional control by Rap1B and their implications in proinflammatory  
450 states.

451 In sum, we identified Rap1B as a novel molecular regulator of EC proinflammatory  
452 response, which may lead to new therapeutic approaches to overcome vascular  
453 immunosuppression in cancer immunotherapy.

454

455



## 456 **Figure, figure supplements and figure source data legends**

### 457 **Figure 1. Global and EC-specific Rap1B deletion restricts tumor growth in vivo.**

458 **(A)** A schematic diagram of melanoma induction in global Rap1B-deficient mice, Rap1B<sup>+/-</sup>, or  
459 EC-specific Rap1B knockouts, Rap1B<sup>ΔEC</sup>. Tumor growth kinetics **(B)**, tumor weight at day 15  
460 **(C)** and representative photographs of melanoma growth **(D)** in Rap1B<sup>+/-</sup> (n=10) vs. Rap1B<sup>+/+</sup>  
461 (n=10) mice. Tumor growth kinetics **(E)**, tumor weights **(F)** and representative photographs of  
462 melanoma growth **(G)** in Rap1B<sup>ΔEC</sup> (n=5) vs. Cre-negative control mice (n=6). Data represent  
463 mean ± SEM. \*, P < 0.05 \*\*, P < 0.01, \*\*\*, P < 0.001, Student's *t* test. Data and statistical  
464 outputs are available in *Figure 1-source data 1* file.

465 **Figure 1-source data 1:** relates to panels A-F.

### 466 **Figure 1- figure supplement 1. Reduced CD31<sup>+</sup> endothelial cells in Rap1B<sup>+/-</sup> tumors. (A).**

467 Gating strategy for endothelial cells (CD31<sup>+</sup>) and leukocytes (CD45<sup>+</sup>) using stained single-cell  
468 suspension from the harvested tumors. Representative plots from a control tumor are shown.  
469 One million events were acquired on BD FACS-diva (LSR II-Green) using single-cell suspension  
470 from the harvested tumors. Viable, 7-AAD-negative cells were identified, and cell doublets were  
471 discriminated by their SSC and FSC characteristics. Single cells were further gated for  
472 leukocytes (CD45<sup>+</sup>/CD31<sup>-</sup>) and endothelial cells (CD31<sup>+</sup>/CD45<sup>-</sup>). **(B)** Decreased number of  
473 tumor endothelial cells (CD31<sup>+</sup>/CD45<sup>-</sup>) isolated from Rap1B<sup>+/-</sup> mice vs. control, shown as % of  
474 gated single cells **(C \***, P < 0.05). Data are presented as the mean ± S.E.M. n = 5 mice per  
475 group, student's *t* test. **(D)** Typical immunofluorescent staining of CD45<sup>+</sup> cells (green) and  
476 CD31<sup>+</sup> endothelial cells (red) in tumor sections. **(E)** CD31<sup>+</sup> endothelial cells quantification  
477 demonstrates a significant decrease in ECs in tumor sections in Rap1B<sup>+/-</sup>, vs. control group (\*, P  
478 < 0.05). n = 3 mice per group, Student's *t* test. Data and statistical outputs are available in  
479 *Figure 1 – figure supplement 1-source data 1* file.

480 **Figure 1 – figure supplement 1-source data 1:** relates to panels C and E.

481

### 482 **Figure 2. Endothelial Rap1B restricts tumor T-cell infiltration. (A-D) Endothelial Rap1B-** 483 **deficiency alters TME cellularity.** Flow cytometry analysis of single cell suspensions from

484 tumors stained with cell-type specific markers demonstrate decreased endothelial cell numbers  
485 (CD31<sup>+</sup> **A**), and increased CD45<sup>+</sup> cells **(B)** in Rap1B<sup>ΔEC</sup> (n=5) vs. control mice (n=5). Gating  
486 strategy shown in Supplementary Fig. S1. CD4<sup>+</sup> T cells **(C)** and CD8<sup>+</sup> T cells **(D)** selected as  
487 shown in gating scheme in Supplementary Figure S3. **(E-H) Elevated T cell activation in**  
488 **Rap1B<sup>ΔEC</sup> vs. control mice.** Surface expression of T-cell activation marker CD44 in CD4<sup>+</sup>T **(E)**  
489 and CD8<sup>+</sup>T **(F)** cells in Rap1B<sup>ΔEC</sup> (n=5) and control mice (n=6) tumors. **(G-H)** Representative

490 FACS plots (**G**) and quantification of median fluorescence intensity, (MFI, **H**) of intracellular  
491 staining for granzyme B (GrB) in tumor CD8<sup>+</sup> T cells from Rap1B<sup>iΔEC</sup> (n=8) and control mice  
492 (n=5). Data represent mean ± SEM. \*, P < 0.05 \*\*, P < 0.01, \*\*\*, P < 0.001, Student's t-test.  
493 Data and statistical outputs are available in *Figure 2-source data 1* file.

494 **Figure 2-source data 1:** relates to panels A-F, H.

495 **Figure 2-figure supplement 1. EC-specific Rap1B deletion alters recruitment of tumor-**  
496 **infiltrating lymphocytes (TIL).** (**A**) Gating and selection of immune cell types from tumor

497 single-cell suspensions. Representative plots from a control tumor are shown. One million  
498 events were acquired on BD FACS-diva (LSR II-Green) using single-cell suspension from the  
499 harvested tumors. Single cells were used to identify CD45<sup>+</sup> leukocytes, which were further gated  
500 using marker-specific antibodies against NK1.1 (natural killer cells), CD4, CD8 and B220 B-  
501 cells. **B-F.** Quantitation of cell populations: (**B**) B cells (B220<sup>+</sup>), (**C**) natural killer cells (NK1.1<sup>+</sup>),  
502 (**D**) myeloid cells (CD11b<sup>+</sup>), (**E**) monocytes (Ly6C<sup>+</sup>) and (**F**) macrophage (F4/80<sup>+</sup>) in single-cell  
503 suspension of tumors from Rap1B<sup>iΔEC</sup> or control mice. Data are presented as the mean ± S.E.M.  
504 \*, P < 0.05. n = 5 mice per group, Student's *t* test. Data and statistical outputs are available in  
505 *Figure 2– figure supplement 1-source data 1* file.

506 **Figure 2– figure supplement 1-source data 1:** relates to panels B-F.

507

508 **Figure 3. Depletion of CD8<sup>+</sup> T cells normalizes tumor growth in Rap1B<sup>iΔEC</sup> mice.**

509 (A) Schematic diagram of antibody treatment (intraperitoneal, I.P. injection) and melanoma  
510 induction (subcutaneous, S.C. injection). (**B**) Quantification of CD8<sup>+</sup> T cells demonstrates highly  
511 efficient cell depletion in with anti-CD8 antibody or IgG isotype control. (**C**) Tumor growth  
512 kinetics in Rap1B<sup>iΔEC</sup> vs. Cre-negative control treated with anti-CD8. (**D**) Gating scheme and  
513 quantification of CD31<sup>+</sup> ECs (**E**) and CD45<sup>+</sup> cells (**F**). Data are presented as the mean ± S.E.M  
514 (n=6 per group). \*, P < 0.05, \*\*, P < 0.01, \*\*\*, P < 0.001, Panels B, C, F: one-way ANOVA with  
515 Tukey's post hoc test. Panel E: Student's *t*-test. Data and statistical outputs are available in  
516 *Figure 3-source data 1* file.

517 **Figure 3-source data 1:** relates to panels B, C, E and F.

518 **Figure 3 – figure supplement 1. Efficiency of CD8<sup>+</sup> T cell depletion in specific tissue**  
519 **compartments.**

520 Peripheral blood cells (**A**), spleen cells (**B**) and bone marrow cells (**C**) were stained with Very  
521 CD8 mAb. Flow analysis showing drastic depletion of CD8<sup>+</sup> cells in all tissue compartment. IgG  
522 isotype control has no significant modulation on T cell. Data are presented as the mean ±  
523 S.E.M. \*\*\*, P < 0.001, \*\*\*\*, P < 0.0001. n = 6 mice per group, one-way ANOVA with Tukey's

524 multiple comparisons post hoc test. Data and statistical outputs are available in *Figure 3 – figure*  
525 *supplement 1-source data 1* file.

526 **Figure 3 – figure supplement 1-source data 1:** relates to panels A-F.

527 **Figure 3 – figure supplement 2. Hematological (CBC) analysis in control and Rap1B<sup>iΔEC</sup>**  
528 **mice after CD8<sup>+</sup> T cell depletion.** Whole blood (13 μl per mouse) was collected into  
529 anticoagulant (1:10) using capillary tubes (StatSpin® Microhematocrit Tubes, VWR). The blood  
530 samples were immediately analyzed using an automated Hematology blood analyzer (Sysmex  
531 XN-1000™). CBC counts: **(A)** White blood cells (WBC) 10<sup>9</sup>/L; **(B)** lymphocyte (LYMPH) 10<sup>9</sup>/L.  
532 **(C)** Immature (young) RBC fraction, as measured by % of high fluorescence reticulocyte (HFR),  
533 **(D)** Platelets (PLT) 10<sup>12</sup>/L, **(E)** Red blood cells (RBC) 10<sup>12</sup>/L, and **(F)** Neutrophils (NEUT). Data  
534 are presented as the mean ± S.E.M. \*, P < 0.05, \*\*, P < 0.01. n = 6 mice per group, one-way  
535 ANOVA with Tukey's multiple comparisons post hoc test. Data and statistical outputs are  
536 available in *Figure 3 – figure supplement 2-source data 1* file.

537 **Figure 3 – figure supplement 2-source data 1:** relates to panels A-C.

538 **Figure 3 – figure supplement 3. Effect of CD8<sup>+</sup> T-cell depletion on tumor-infiltrating**  
539 **lymphocytes (TIL) in control and Rap1B<sup>iΔEC</sup> mice.** Immunophenotypic examination showing  
540 quantitation of **(A)** CD4<sup>+</sup>T cells, **(B)** B cells (B220<sup>+</sup>), **(C)** myeloid cells (CD11b<sup>+</sup>), **(D)** monocytes  
541 (Ly6C<sup>+</sup>), **(E)** neutrophils (Ly6G<sup>+</sup>) and **(F)** macrophage (F4/80<sup>+</sup>) in Rap1B<sup>iΔEC</sup>/control mice treated  
542 with either IgG isotope or CD8 mAb. Data are presented as the mean ± S.E.M. \*, P < 0.05, \*\*, P  
543 < 0.01. n = 6 mice per group, one-way ANOVA with Tukey's multiple comparisons post hoc test.  
544 Data and statistical outputs are available in *Figure 3 – figure supplement 3-source data 1* file.

545 **Figure 3 – figure supplement 3-source data 1:** relates to panels A-F.

546 **Figure 3 – figure supplement 4. Depletion of CD8<sup>+</sup> T-cells normalizes tumor growth in**  
547 **Rap1B<sup>iΔEC</sup> mice.** Representative photographs showing pattern of tumor growth in  
548 Rap1B<sup>iΔEC</sup>/control mice treated with either IgG isotope or CD8 mAb. **(A)** IgG isotope has no  
549 effect on tumor growth in control group. **(B)** CD8<sup>+</sup> T cell depletion significantly rescued tumor  
550 reduction in Rap1B<sup>iΔEC</sup> mice group.

551

552 **Figure 4. Endothelial Rap1B restricts TNF-α induced NFκB activation.**

553 Increased TNF-α signaling and NFκB transcription detected by bulk RNA sequencing of TNF-α-  
554 treated siRap1B and siControl Ecs. **(A)** Gene set enrichment analysis (GSEA) of genes in TNF-  
555 α signaling pathway upregulated in siRap1B vs. siControl. **(B)** Heatmap of selected genes from  
556 TNF-α signaling pathway. **(C)** GSEA of NFκB signaling pathway. **(D)** Transcriptional activation  
557 of NFκB in siRap1B ECs. **(E)** TNF-α-induced NFκB activity determined by luciferase assay in

558 cells transfected with NF- $\kappa$ B reporter construct or a control vector (CMV). Values shown as  
559 mean fold change vs. PBS-treated cells. Error bars represent mean  $\pm$  SD (n = 6). \*, P < 0.05,  
560 \*\*\*\*, P < 0.0005. One-way ANOVA followed by Tukey's multiple comparisons test. **(F)** Heatmap  
561 of selected genes from NF $\kappa$ B pathway. (n = 5 separate EC sets per group). Link to sequence  
562 data deposited within NCBI GEO is available in *Figure 4-source data 1* file. Data and statistical  
563 outputs for panel E are available in *Figure 4-source data 2* file.

564 **Figure 4-source data 1:** relates to panels A-D and F.

565 **Figure 4-source data 2:** relates to panel E.

566 **Figure 4 – figure supplement 1. Transcriptomic analysis of TNF- $\alpha$ -stimulated siControl**  
567 **and siRap1B ECs. (A)** Principal component analysis of samples. **(B)** Volcano plot of differential  
568 gene expression, the top 50 significantly differentially expressed genes are labeled. **(C)** Gene  
569 set enrichment analyses (GSEA) of NF $\kappa$ B target genes. **(D)** Dot plot of top significantly enriched  
570 transcription factors by GSEA (n = 5). Link to sequence data deposited within NCBI GEO is  
571 available in *Figure 4-source data 1* file.

572

573 **Figure 5. Endothelial Rap1B restricts proinflammatory CAM expression, mediates VEGF**  
574 **signaling. (A)** Top: Densitometry of TNF $\alpha$ -induced VCAM-1 expression, normalized to actin, in  
575 siControl- or siRap1B- transfected HUVECs. Bottom: representative Western blot. Original  
576 images are available in *Figure 5-source data 1* file. **(B, C)** VCAM-1 expression in tumor ECs  
577 (CD31<sup>+</sup> cells): representative flow cytometry histogram **(B)** and median fluorescence intensity  
578 (MFI) **(C)**. n  $\geq$  5 mice per group, **(D, E)** EC-Rap1B deficiency leads to increased leukocyte  
579 adhesion in vitro. Representative image **(D)** and quantification **(E)** of Calcein-AM-labeled Jurkat  
580 cells adhering to siRap1B and siControl ECs following TNF- $\alpha$  treatment 12 hours. Adhesion  
581 efficiency is expressed as Jurkat cells bound/10,000 plated. **(F)** VEGF treatment inhibits TNF- $\alpha$ -  
582 induced CAM expression in siControl but not in siRap1B ECs. Densitometry (top) and  
583 representative Western blot (bottom) are shown. Original images are available in *Figure 5-*  
584 *source data 2* file. Data shown are mean  $\pm$  S.E.M. \*, P < 0.05, \*\*, P < 0.01, \*\*\*, P < 0.001,  
585 Panels A, E, F: one-way ANOVA followed by Tukey's multiple comparisons test. Panel C:  
586 Student's t-test. Data and statistical outputs are available in *Figure 5-source data 3* file.

587 **Figure 5-source data 1:** original images of Western blots in panel A.

588 **Figure 5-source data 2:** original images of Western blots in panel F.

589 **Figure 5-source data 3:** relates to panels A, C, E and F.

590 **Figure 5 – figure supplement 1. Elevated ICAM-1 surface expression in Rap1B-deficient**  
591 **tumor ECs and HUVECs. (A)** Flow cytometric analysis of ICAM-1 expression on siRap1B and

592 siControl HUVEC cells. (B) Flow cytometric analysis of ICAM-1 expression on tumor ECs from  
593 Rap1B<sup>iΔEC</sup> and control mice: representative flow cytometry histogram and median fluorescence  
594 intensity (MFI) plot (C). Data are presented as the mean ± S.E.M. \*\*, P < 0.01, Student's t test.

595 Data and statistical outputs are available in *Figure 5 – figure supplement 1-source data 1* file.

596 **Figure 5 – figure supplement 1-source data 1:** relates to panels A and C.

597

598 **Figure 6. Endothelial Rap1B conveys VEGF suppression of immune reactivity – proposed**

599 **mechanism.** Under normal conditions Rap1 suppresses cytokine-induced CAM expression,  
600 limiting T-cell adhesion and recruitment. In proangiogenic conditions of TME, VEGF signaling,  
601 mediated by Rap1B, suppresses this endothelial immune response.

602

603

604

605

606

607

608

609

610

611

612

613

614

615

616

617

618

619

620

621

622

623

## 624 **References**

- 625 Ager, A., H.A. Watson, S.C. Wehenkel, and R.N. Mohammed. 2016. Homing to solid cancers: A  
626 vascular checkpoint in adoptive cell therapy using CAR T-cells. *Biochemical Society*  
627 *Transactions*. 44:377-385.
- 628 Benjamini, Y., and Y. Hochberg. 1995. Controlling the False Discovery Rate: A Practical and  
629 Powerful Approach to Multiple Testing. *Journal of the Royal Statistical Society. Series B*  
630 *(Methodological)*. 57:289-300.
- 631 Boettner, B., and L. Van Aelst. 2009. Control of cell adhesion dynamics by Rap1 signaling.  
632 *Current Opinion in Cell Biology*. 21:684-693.
- 633 Carmona, G., S. Gottig, A. Orlandi, J. Scheele, T. Bauerle, M. Jugold, F. Kiessling, R.  
634 Henschler, A.M. Zeiher, S. Dimmeler, and E. Chavakis. 2009. Role of the small GTPase  
635 Rap1 for integrin activity regulation in endothelial cells and angiogenesis. *Blood*.  
636 113:488-497.
- 637 Chrzanowska-Wodnicka, M. 2010. Regulation of angiogenesis by a small GTPase Rap1.  
638 *Vascular Pharmacology*. 53:1-10.
- 639 Chrzanowska-Wodnicka, M. 2013. Distinct functions for Rap1 signaling in vascular  
640 morphogenesis and dysfunction. *Experimental Cell Research*. 319:2350-2359.
- 641 Chrzanowska-Wodnicka, M., A.E. Kraus, D. Gale, G.C. White, 2nd, and J. Vansluys. 2008.  
642 Defective angiogenesis, endothelial migration, proliferation, and MAPK signaling in  
643 Rap1b-deficient mice. *Blood*. 111:2647-2656.
- 644 Chrzanowska-Wodnicka, M., S.S. Smyth, S.M. Schoenwaelder, T.H. Fischer, and G.C. White.  
645 2005. Rap1b is required for normal platelet function and hemostasis in mice. *Journal of*  
646 *Clinical Investigation*. 115:2296-2296.
- 647 Dirx, A.E.M., M.G.A. Oude Egbrink, K. Castermans, D.W.J. Van Der Schaft, V.L.J.L. Thijssen,  
648 R.P.M. Dings, L. Kwee, K.H. Mayo, J. Wagstaff, J.C.A. Bouma-ter Steege, and A.W.  
649 Griffioen. 2006. Anti-angiogenesis therapy can overcome endothelial cell anergy and  
650 promote leukocyte-endothelium interactions and infiltration in tumors. *FASEB Journal*.  
651 20:621-630.
- 652 Ebos, J.M.L., C.R. Lee, W. Cruz-Munoz, G.A. Bjarnason, J.G. Christensen, and R.S. Kerbel.  
653 2009. Accelerated Metastasis after Short-Term Treatment with a Potent Inhibitor of  
654 Tumor Angiogenesis. *Cancer Cell*. 15:232-239.
- 655 Fabregat, A., S. Jupe, L. Matthews, K. Sidiropoulos, M. Gillespie, P. Garapati, R. Haw, B.  
656 Jassal, F. Korninger, B. May, M. Milacic, C.D. Roca, K. Rothfels, C. Sevilla, V.  
657 Shamovsky, S. Shorser, T. Varusai, G. Viteri, J. Weiser, G. Wu, L. Stein, H. Hermjakob,



- 658 and P. D'Eustachio. 2018. The Reactome Pathway Knowledgebase. *Nucleic Acids*  
659 *Research*. 46:D649-D655.
- 660 Ferrara, N., and A.P. Adamis. 2016. Ten years of anti-vascular endothelial growth factor  
661 therapy. *Nature Reviews Drug Discovery*. 15:385-403.
- 662 Fridman, W.H., F. Pagès, C. Sauts-Fridman, and J. Galon. 2012. The immune contexture in  
663 human tumours: Impact on clinical outcome. *Nature Reviews Cancer*. 12:298-306.
- 664 Graham, V.A., A.L. Marzo, and D.F. Tough. 2007. A role for CD44 in T cell development and  
665 function during direct competition between CD44+ and CD44- cells. *European Journal*  
666 *of Immunology*. 37:925-934.
- 667 Griffioen, A.W., C.A. Damen, S. Martinotti, G.H. Blijham, and G. Groenewegen. 1996.  
668 Endothelial intercellular adhesion molecule-1 expression is suppressed in human  
669 malignancies: The role of angiogenic factors. *Cancer Research*. 56:1111-1117.
- 670 Gu, S.X., I.O. Blokhin, K.M. Wilson, N. Dhanesha, P. Doddapattar, I.M. Grumbach, A.K.  
671 Chauhan, and S.R. Lentz. 2016. Protein methionine oxidation augments reperfusion  
672 injury in acute ischemic stroke. *JCI insight*. 1.
- 673 Hendry, S.A., R.H. Farnsworth, B. Solomon, M.G. Achen, S.A. Stacker, and S.B. Fox. 2016.  
674 The role of the tumor vasculature in the host immune response: Implications for  
675 therapeutic strategies targeting the tumor microenvironment. *Frontiers in Immunology*. 7.
- 676 Huang, H., E. Langenkamp, M. Georganaki, A. Loskog, P.F. Fuchs, L.C. Dieterich, J. Kreuger,  
677 and A. Dimberg. 2015. VEGF suppresses T-lymphocyte infiltration in the tumor  
678 microenvironment through inhibition of NF- $\kappa$ B-induced endothelial activation. *FASEB*  
679 *Journal*. 29:227-238.
- 680 Joyce, J.A., and D.T. Fearon. 2015. T cell exclusion, immune privilege, and the tumor  
681 microenvironment. *Science*. 348:74-80.
- 682 Kelso, A., E.O. Costelloe, B.J. Johnson, P. Groves, K. Buttigieg, and D.R. Fitzpatrick. 2002. The  
683 genes for perforin, granzymes A-C and IFN- $\gamma$  are differentially expressed in single  
684 CD8+ T cells during primary activation. *International Immunology*. 14:605-613.
- 685 Lakshmikanthan, S., M. Sobczak, C. Chun, A. Henschel, J. Dargatz, R. Ramchandran, and M.  
686 Chrzanowska-Wodnicka. 2011. Rap1 promotes VEGFR2 activation and angiogenesis by  
687 a mechanism involving integrin  $\alpha$ v $\beta$ 3. *Blood*. 118:2015-2026.
- 688 Lakshmikanthan, S., M. Sobczak, S. Li Calzi, L. Shaw, M.B. Grant, and M. Chrzanowska-  
689 Wodnicka. 2018. Rap1B promotes VEGF-induced endothelial permeability and is  
690 required for dynamic regulation of the endothelial barrier. *Journal of Cell Science*. 131.

- 691 Lakshmikanthan, S., X. Zheng, Y. Nishijima, M. Sobczak, A. Szabo, J. Vasquez-Vivar, D.X.  
692 Zhang, and M. Chrzanowska-Wodnicka. 2015. Rap1 promotes endothelial  
693 mechanosensing complex formation, NO release and normal endothelial function.  
694 *EMBO Reports*. 16:628-637.
- 695 Ley, K., C. Laudanna, M.I. Cybulsky, and S. Nourshargh. 2007. Getting to the site of  
696 inflammation: The leukocyte adhesion cascade updated. *Nat. Rev. Immunol.* 7:678-689.
- 697 Liberzon, A., A. Subramanian, R. Pinchback, H. Thorvaldsdóttir, P. Tamayo, and J.P. Mesirov.  
698 2011. Molecular signatures database (MSigDB) 3.0. *Bioinformatics*. 27:1739-1740.
- 699 Love, M.I., W. Huber, and S. Anders. 2014. Moderated estimation of fold change and dispersion  
700 for RNA-seq data with DESeq2. *Genome Biology*. 15.
- 701 Ogata, H., S. Goto, K. Sato, W. Fujibuchi, H. Bono, and M. Kanehisa. 1999. KEGG: Kyoto  
702 encyclopedia of genes and genomes. *Nucleic Acids Research*. 27:29-34.
- 703 Pàez-Ribes, M., E. Allen, J. Hudock, T. Takeda, H. Okuyama, F. Viñals, M. Inoue, G. Bergers,  
704 D. Hanahan, and O. Casanovas. 2009. Antiangiogenic Therapy Elicits Malignant  
705 Progression of Tumors to Increased Local Invasion and Distant Metastasis. *Cancer Cell*.  
706 15:220-231.
- 707 Patro, R., G. Duggal, M.I. Love, R.A. Irizarry, and C. Kingsford. 2017. Salmon provides fast and  
708 bias-aware quantification of transcript expression. *Nature Methods*. 14:417-419.
- 709 Piali, L., A. Fichtl, H.J. Terpe, B.A. Imhof, and R.H. Gisler. 1995. Endothelial vascular cell  
710 adhesion molecule 1 expression is suppressed by melanoma and carcinoma. *Journal of*  
711 *Experimental Medicine*. 181:811-816.
- 712 Picelli, S., O.R. Faridani, Å.K. Björklund, G. Winberg, S. Sagasser, and R. Sandberg. 2014. Full-  
713 length RNA-seq from single cells using Smart-seq2. *Nat. Protoc.* 9:171-181.
- 714 Seigner, J., M. Junker-Samek, A. Plaza, G. D'Urso, M. Masullo, S. Piacente, Y.M. Holper-  
715 Schichl, and R. de Martin. 2019. A Symphytum officinale Root Extract Exerts Anti-  
716 inflammatory Properties by Affecting Two Distinct Steps of NF-κB Signaling. *Front*  
717 *Pharmacol.* 10:289-289.
- 718 Shrimali, R.K., Z. Yu, M.R. Theoret, D. Chinnasamy, N.P. Restifo, and S.A. Rosenberg. 2010.  
719 Antiangiogenic agents can increase lymphocyte infiltration into tumor and enhance the  
720 effectiveness of adoptive immunotherapy of cancer. *Cancer Research*. 70:6171-6180.
- 721 Singh, B., R. Kosuru, S. Lakshmikanthan, M.G. Sorci-Thomas, D.X. Zhang, R. Sparapani, J.  
722 Vasquez-Vivar, and M. Chrzanowska. 2021. Endothelial Rap1 (Ras-Association  
723 Proximate 1) Restricts Inflammatory Signaling to Protect From the Progression of  
724 Atherosclerosis. *Arteriosclerosis, Thrombosis, and Vascular Biology*. 41:638-650.

725 Subramanian, A., P. Tamayo, V.K. Mootha, S. Mukherjee, B.L. Ebert, M.A. Gillette, A.  
726 Paulovich, S.L. Pomeroy, T.R. Golub, E.S. Lander, and J.P. Mesirov. 2005. Gene set  
727 enrichment analysis: A knowledge-based approach for interpreting genome-wide  
728 expression profiles. *Proceedings of the National Academy of Sciences of the United*  
729 *States of America*. 102:15545-15550.

730 Wilhelmsen, K., K. Farrar, and J. Hellman. 2013. Quantitative in vitro assay to measure  
731 neutrophil adhesion to activated primary human microvascular endothelial cells under  
732 static conditions. *Journal of visualized experiments : JoVE*:e50677-e50677.

733 Xin, G., A. Khatun, P. Topchyan, R. Zander, P.J. Volberding, Y. Chen, J. Shen, C. Fu, A. Jiang,  
734 W.A. See, and W. Cui. 2020. Pathogen-boosted adoptive cell transfer therapy induces  
735 endogenous antitumor immunity through antigen spreading. *Cancer Immunology*  
736 *Research*. 8:7-18.

737 Yan, J., F. Li, D.A. Ingram, and L.A. Quilliam. 2008. Rap1a is a key regulator of fibroblast  
738 growth factor 2-induced angiogenesis and together with Rap1b controls human  
739 endothelial cell functions. *Molecular and Cellular Biology*. 28:5803-5810.

740  
741

## 742 Supplemental Table 1: Key Resources and Antibodies

743

| Reagent type (species) or resource | Designation                                                    | Source or reference       | Identifiers                      | Additional information                                   |
|------------------------------------|----------------------------------------------------------------|---------------------------|----------------------------------|----------------------------------------------------------|
| (Mus musculus)                     | VE-Cadh-CreN-Rap1a <sup>+/+</sup> Rap1b <sup>fff</sup>         | In house breeding         |                                  | C57Bl/6 genetic background                               |
| (Mus musculus)                     | VE-Cadh-CreY-Rap1a <sup>+/+</sup> Rap1b <sup>fff</sup>         | In house breeding         |                                  | C57Bl/6 genetic background                               |
| (Mus musculus)                     | Rap1B <sup>(+/-)</sup>                                         | In house breeding         |                                  | C57Bl/6 genetic background                               |
| (Mus musculus)                     | Rap1B <sup>(+/+)</sup>                                         | In house breeding         |                                  | C57Bl/6 genetic background                               |
| Other                              | HUVECs( Human Umbilical Vein ECs)                              | ATCC                      | Cat# CRL-1730<br>RRID:CVCL_2959  |                                                          |
| Other                              | B16F10                                                         | ATCC                      | Cat# CRL-6475<br>RRID:CVCL_0159  | Mouse melanoma cell line                                 |
| Other                              | Jurkat E6-1                                                    | ATCC                      | Cat# TIB-152                     | Human T cell leukemia cell line                          |
| Other                              | Rap1B siRNA                                                    | Dharmacon                 |                                  | 50nM in reaction                                         |
| Other                              | Control siRNA                                                  | Dharmacon                 |                                  | 50nM in reaction                                         |
| Chemical compound, drug            | TNF- $\alpha$                                                  | Sigma-Aldrich             | Cat# H8916-10UG                  | 50nM in assay                                            |
| Chemical compound, drug            | VEGF                                                           | Sigma-Aldrich             | Cat# V7259                       | 50 ng/ml in assay                                        |
| Chemical compound, drug            | Calcein Blue AM                                                | BD Biosciences            | Cat# 564060                      | 5uM in assay                                             |
| Other                              | pNL3.2.NF- $\kappa$ B-RE[NlucP/NF- $\kappa$ B-RE/Hygro] Vector | Promega                   | Cat#N1111                        | 2 ug in assay                                            |
| Other                              | pNL3.2.CMV                                                     | Promega                   | Cat#N1411                        | 2 ug in assay                                            |
| Assay kit                          | Nano-Glo <sup>®</sup> Luciferase Assay System                  | Promega                   | Cat.# N1110                      |                                                          |
| Antibody                           | VCAM-1 (clone E1E8X) Rabbit mAb antibody                       | Cell Signaling Technology | Cat# 13662,<br>RRID:AB_2798286   | WB (1:2000)                                              |
| Antibody                           | Rap1A/Rap1B (clone 26B4) Rabbit mAb antibody                   | Cell Signaling Technology | Cat# 2399,<br>RRID:AB_2284915    | WB (1:2000)                                              |
| Antibody                           | $\beta$ -Actin mouse, rat, human (clone C4) mAb antibody       | Santa Cruz Biotechnology  | Cat# sc-47778<br>RRID:AB_2714189 | WB (1:500)                                               |
| Software, algorithm                | GraphPad Prism version 5.02                                    | GraphPad Software         |                                  |                                                          |
| Software, algorithm                | Flow Jo software                                               |                           |                                  |                                                          |
| Antibody                           | FITC anti-mouse CD3, clone: 145-2C11                           | Bio Legend                | Cat# 100305,<br>RRID:AB_312670   | Dilution: 1:300<br>For Tumor Infiltrate Lymphocyte (TIL) |

|          |                                                                      |            |                               |                                                       |
|----------|----------------------------------------------------------------------|------------|-------------------------------|-------------------------------------------------------|
|          | (Armenian Hamster-monoclonal)                                        |            |                               | analysis by flow cytometry                            |
| Antibody | APC anti-mouse CD4, Clone GK1.5, (rat-monoclonal)                    | Bio Legend | Cat# 100412, RRID:AB_312697   | Dilution: 1:400<br>For TIL analysis by flow cytometry |
| Antibody | FITC anti-mouse CD4, Clone GK1.5, (rat-monoclonal)                   | Bio Legend | Cat# 100405, RRID:AB_312690   | Dilution: 1:400<br>For TIL analysis by flow cytometry |
| Antibody | Brilliant Violet 510(TM) anti-mouse, Clone M1/70, (rat-monoclonal)   | Bio Legend | Cat# 101263, RRID:AB_2629529  | Dilution: 1:400<br>For TIL analysis by flow cytometry |
| Antibody | PE/Cyanine7 anti-mouse CD31, Clone 390, (rat-monoclonal)             | Bio Legend | Cat# 102418, RRID:AB_830757   | Dilution: 1:300<br>For TIL analysis by flow cytometry |
| Antibody | APC/Cyanine7 anti-mouse CD44, Clone IM7, (rat-monoclonal)            | Bio Legend | Cat# 103028, RRID:AB_830785   | Dilution: 1:400<br>For TIL analysis by flow cytometry |
| Antibody | PE/Cyanine5 anti-mouse CD45, Clone 30-F11, (rat-monoclonal)          | Bio Legend | Cat# 103109, RRID:AB_312974   | Dilution: 1:400<br>For TIL analysis by flow cytometry |
| Antibody | APC/Cyanine7 anti-mouse CD45, Clone 30-F11, (rat-monoclonal)         | Bio Legend | Cat# 103116, RRID:AB_312981   | Dilution: 1:400<br>For TIL analysis by flow cytometry |
| Antibody | PE/Dazzle(TM) 594 anti-mouse, clone RA3-6B2, (rat-monoclonal)        | Bio Legend | Cat# 103258, RRID:AB_2564053  | Dilution: 1:200<br>For TIL analysis by flow cytometry |
| Antibody | Pacific Blue(TM) anti-mouse F4/80, Clone BM8, (rat-monoclonal)       | Bio Legend | Cat# 123124, RRID:AB_893475   | Dilution: 1:300<br>For TIL analysis by flow cytometry |
| Antibody | Alexa Fluor(R) 700 anti-mouse Ly-6G, Clone 1A8, (rat-monoclonal)     | Bio Legend | Cat# 127622, RRID:AB_10643269 | Dilution: 1:300<br>For TIL analysis by flow cytometry |
| Antibody | PE anti-mouse Ly-6C, Clone HK1.4, (rat-monoclonal)                   | Bio Legend | Cat# 128007, RRID:AB_1186133  | Dilution: 1:300<br>For TIL analysis by flow cytometry |
| Antibody | PerCP anti-mouse Ly-6G/Ly-6C (Gr-1), Clone RB6-8C5, (rat-monoclonal) | Bio Legend | Cat# 108425, RRID:AB_893560   | Dilution: 1:400<br>For TIL analysis by flow cytometry |
| Antibody | APC anti-mouse NK-1.1, Clone PK136, (rat-                            | Bio Legend | Cat# 108709, RRID:AB_313396   | Dilution: 1:200<br>For TIL analysis by flow cytometry |

|          |                                                                      |                          |                                   |                                                       |
|----------|----------------------------------------------------------------------|--------------------------|-----------------------------------|-------------------------------------------------------|
|          | monoclonal)                                                          |                          |                                   |                                                       |
| Antibody | PE anti-mouse CD8a, Clone 53-6.7, (rat-monoclonal)                   | Thermo Fisher Scientific | Cat# 12-0081-82, RRID:AB_465530   | Dilution: 1:200<br>For TIL analysis by flow cytometry |
| Antibody | eFluor 450 anti-mouse CD106 (VCAM-1), Clone 429, (rat-monoclonal)    | Thermo Fisher Scientific | Cat# 48-1061-82, RRID:AB_1633378) | Dilution: 1:300<br>For TIL analysis by flow cytometry |
| Antibody | FITC anti-mouse CD54 (ICAM-1), Clone YN1/1.7.4, (rat-monoclonal)     | Thermo Fisher Scientific | Cat# 11-0541-82, RRID:AB_465094)  | Dilution: 1:300<br>For TIL analysis by flow cytometry |
| Antibody | PE cy7 anti-mouse Granzyme B, Clone NGZB, (rat-monoclonal)           | Thermo Fisher Scientific | Cat# 25-8898-82, RRID:AB_10853339 | Dilution: 1:200<br>For TIL analysis by flow cytometry |
| Antibody | eFluor 450-Rat IgG1 κ Isotype control, Clone eBRG1, (rat-monoclonal) | Thermo Fisher Scientific | Cat# 48-4301-82, RRID:AB_1271984  | Dilution: 1:200<br>For FMO control in flow cytometry  |
| Antibody | PE cy7-Rat IgG2a κ Isotype control, Clone eBR2a, (rat-monoclonal)    | Thermo Fisher Scientific | Cat# 25-4321-82, RRID:AB_470200   | Dilution: 1:200<br>For FMO control in flow cytometry  |
| Antibody | FITC-Rat IgG2b κ Isotype control, Clone eB149/10H5, (rat-monoclonal) | Thermo Fisher Scientific | Cat# 11-4031-82, RRID:AB_470004)  | Dilution: 1:200<br>For FMO control in flow cytometry  |

744

745



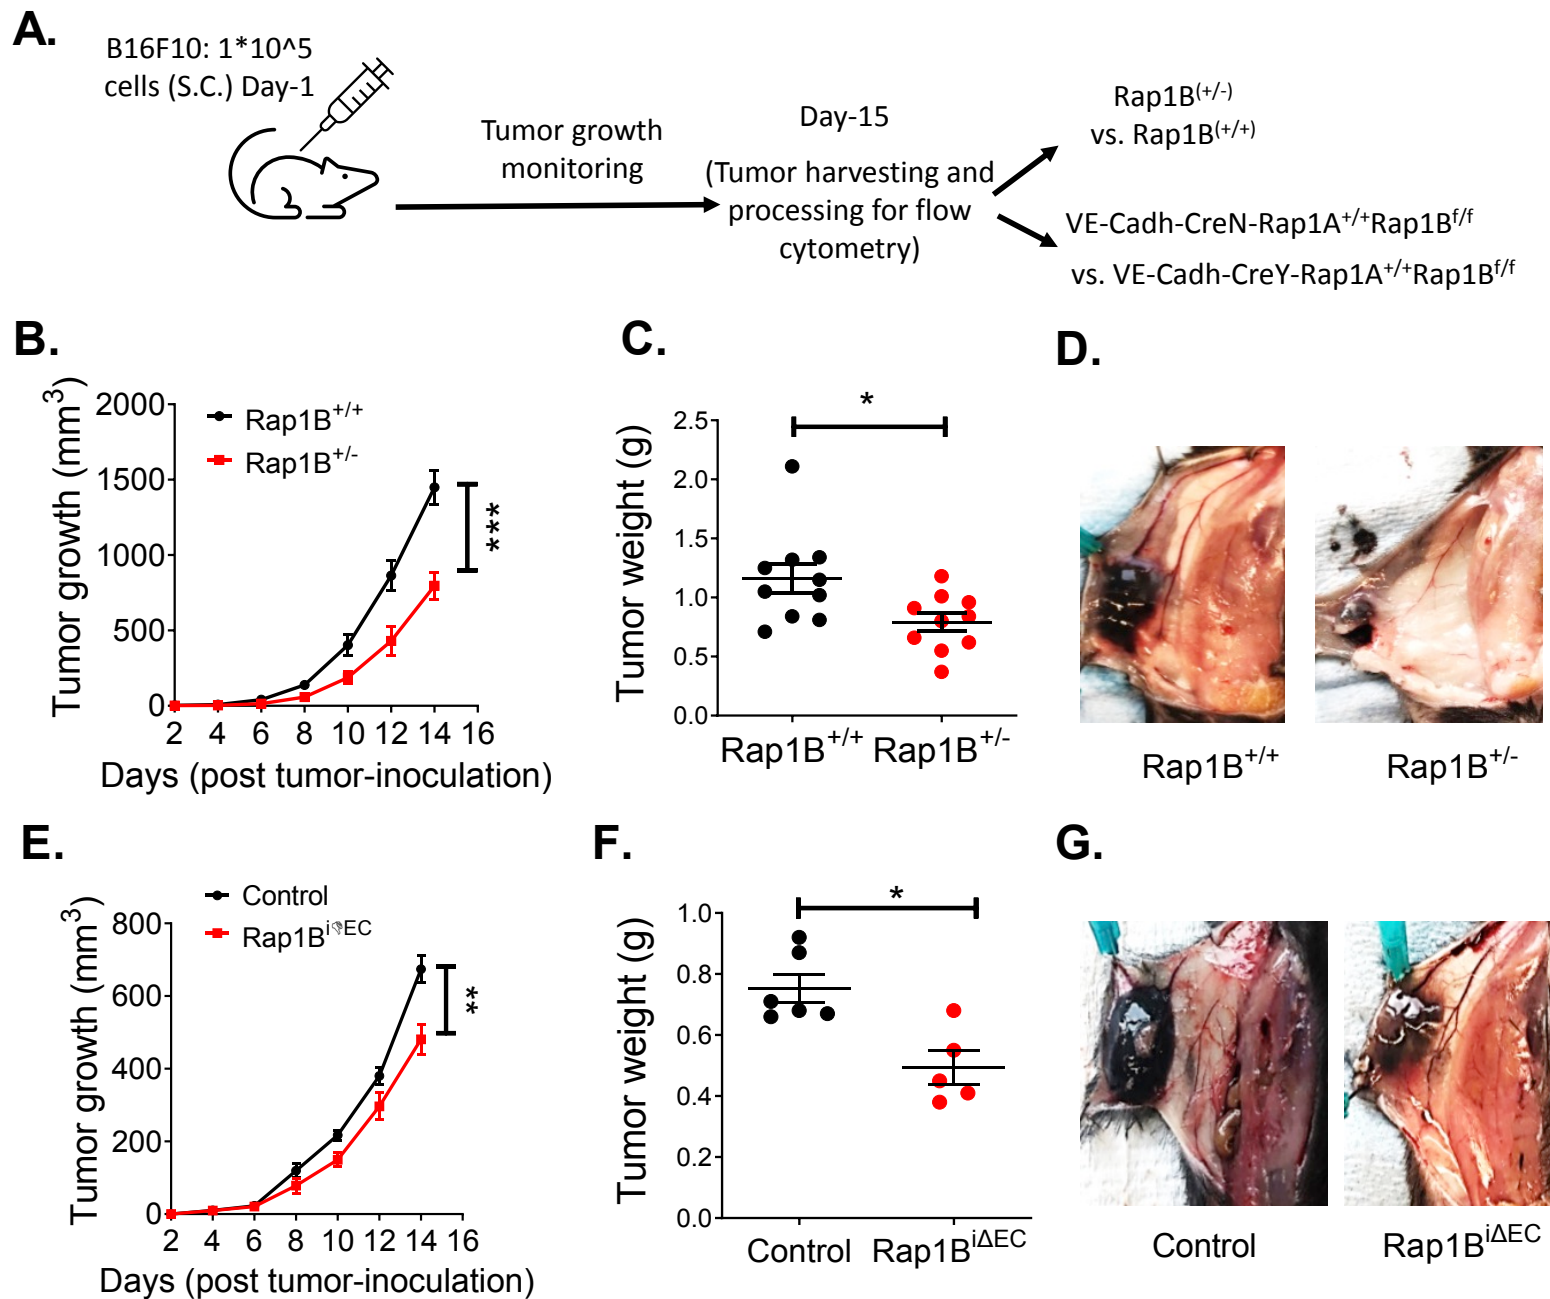

**Figure 1. Global and EC-specific Rap1B deletion restricts tumor growth in vivo.**

(A) A schematic diagram of melanoma induction in global Rap1B-deficient mice, Rap1B<sup>+/-</sup>, or EC-specific Rap1B knockouts, Rap1B<sup>iΔEC</sup>. Tumor growth kinetics (B), tumor weight at day 15 (C) and representative photographs of melanoma growth (D) in Rap1B<sup>+/-</sup> (n=10) vs. Rap1B<sup>+/+</sup> (n=10) mice. Tumor growth kinetics (E), tumor weights (F) and representative photographs of melanoma growth (G) in Rap1B<sup>iΔEC</sup> (n=5) vs. Cre-negative control mice (n=6). Data represent mean ± SEM. \*, P < 0.05 \*\*, P < 0.01, \*\*\*, P < 0.001, Student's *t* test. Data and statistical outputs are available in *Figure 1-source data 1* file.

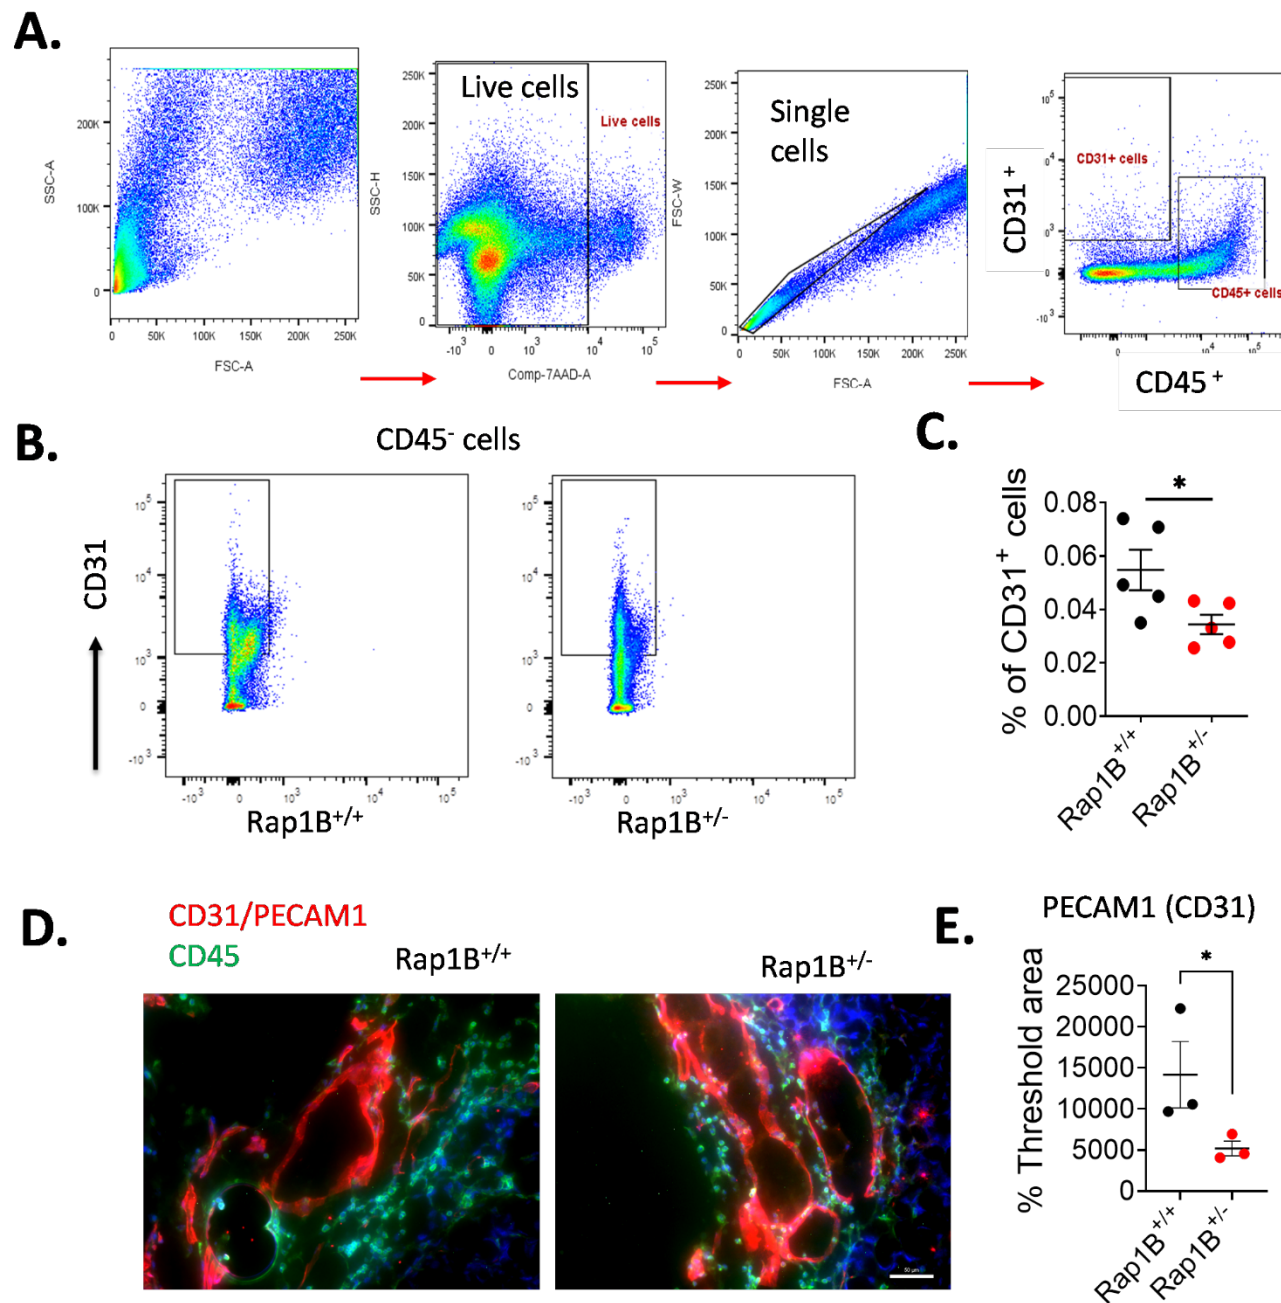

**Figure 1- figure supplement 1. Reduced CD31<sup>+</sup> endothelial cells in Rap1B<sup>+/-</sup> tumors.** (A). Gating strategy for endothelial cells (CD31<sup>+</sup>) and leukocytes (CD45<sup>+</sup>) using stained single-cell suspension from the harvested tumors. Representative plots from a control tumor are shown. One million events were acquired on BD FACS-diva (LSR II-Green) using single-cell suspension from the harvested tumors. Viable, 7-AAD-negative cells were identified, and cell doublets were discriminated by their SSC and FSC characteristics. Single cells were further gated for leukocytes (CD45<sup>+</sup>/CD31<sup>-</sup>) and endothelial cells (CD31<sup>+</sup>/CD45<sup>-</sup>). (B) Decreased number of tumor endothelial cells (CD31<sup>+</sup>/CD45<sup>-</sup>) isolated from Rap1B<sup>+/-</sup> mice vs. control, shown as % of gated single cells (C \*, P < 0.05). Data are presented as the mean ± S.E.M. n = 5 mice per group, student's *t* test. (D) Typical immunofluorescent staining of CD45<sup>+</sup> cells (green) and CD31<sup>+</sup> endothelial cells (red) in tumor sections. (E) CD31<sup>+</sup> endothelial cells quantification demonstrates a significant decrease in ECs in tumor sections in Rap1B<sup>+/-</sup>, vs. control group (\*, P < 0.05). n = 3 mice per group, Student's *t* test. Data and statistical outputs are available in Figure 1 – figure supplement 1-source data 1 file.

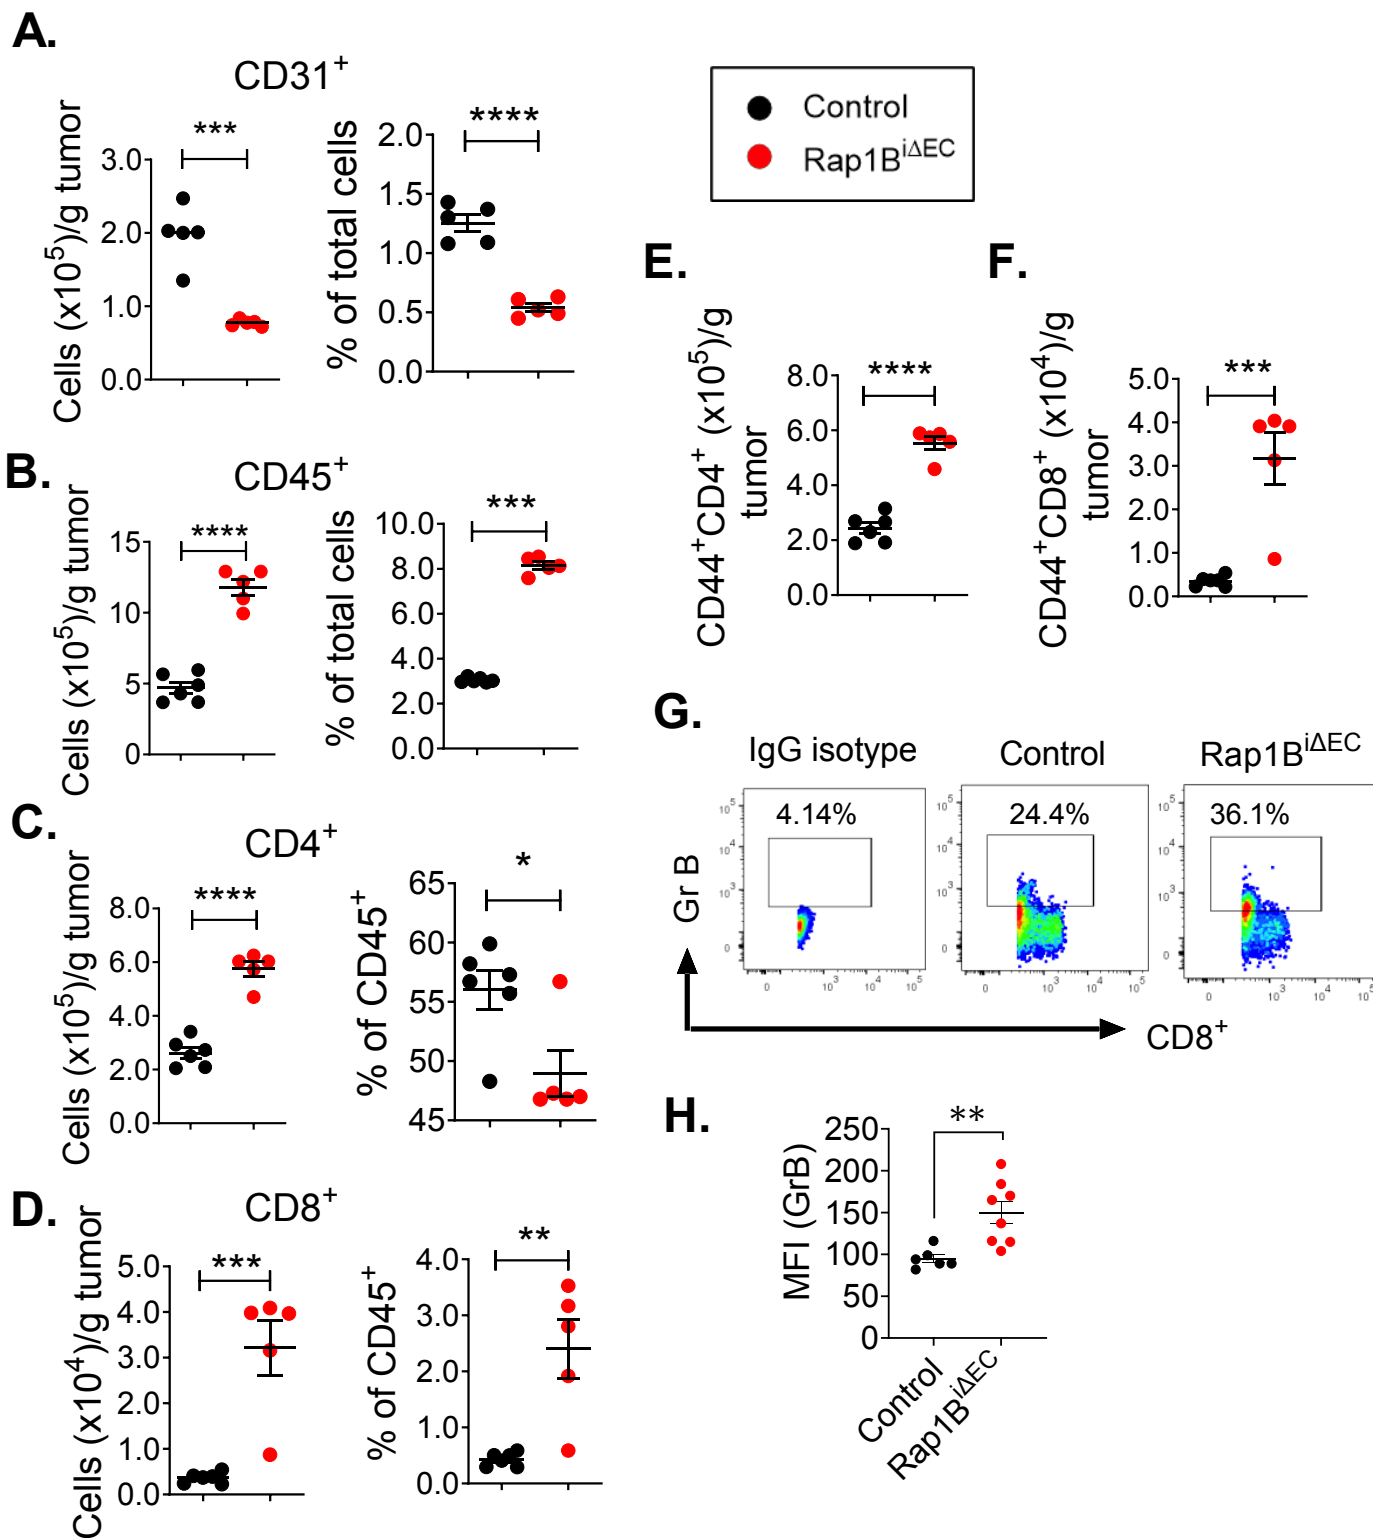

**Figure 2. Endothelial Rap1B restricts tumor T-cell infiltration. (A-D) Endothelial Rap1B-deficiency alters TME cellularity.** Flow cytometry analysis of single cell suspensions from tumors stained with cell-type specific markers demonstrate decreased endothelial cell numbers (CD31<sup>+</sup>, **A**), and increased CD45<sup>+</sup> cells (**B**) in Rap1B<sup>ΔEC</sup> (n=5) vs. control mice (n=5). Gating strategy shown in Supplementary Fig. S1. CD4<sup>+</sup> T cells (**C**) and CD8<sup>+</sup> T cells (**D**) selected as shown in gating scheme in Supplementary Fig. S3. **(E-H) Elevated T cell activation in Rap1B<sup>ΔEC</sup> vs. control mice.** Surface expression of T-cell activation marker CD44 in CD4<sup>+</sup>T (**E**) and CD8<sup>+</sup>T (**F**) cells in Rap1B<sup>ΔEC</sup> (n=5) and control mice (n=6) tumors. **(G-H) Elevated T cell activation in Rap1B<sup>ΔEC</sup> vs. control mice.** Representative FACS plots (**G**) and quantification of median fluorescence intensity, (MFI, **H**) of intracellular staining for granzyme B (GrB) in tumor CD8<sup>+</sup> T cells from Rap1B<sup>ΔEC</sup> (n=8) and control mice (n=5). Data represent mean ± SEM. \*, P < 0.05, \*\*, P < 0.01, \*\*\*, P < 0.001, Student's t-test. Data and statistical outputs are available in *Figure 2-source data 1* file.

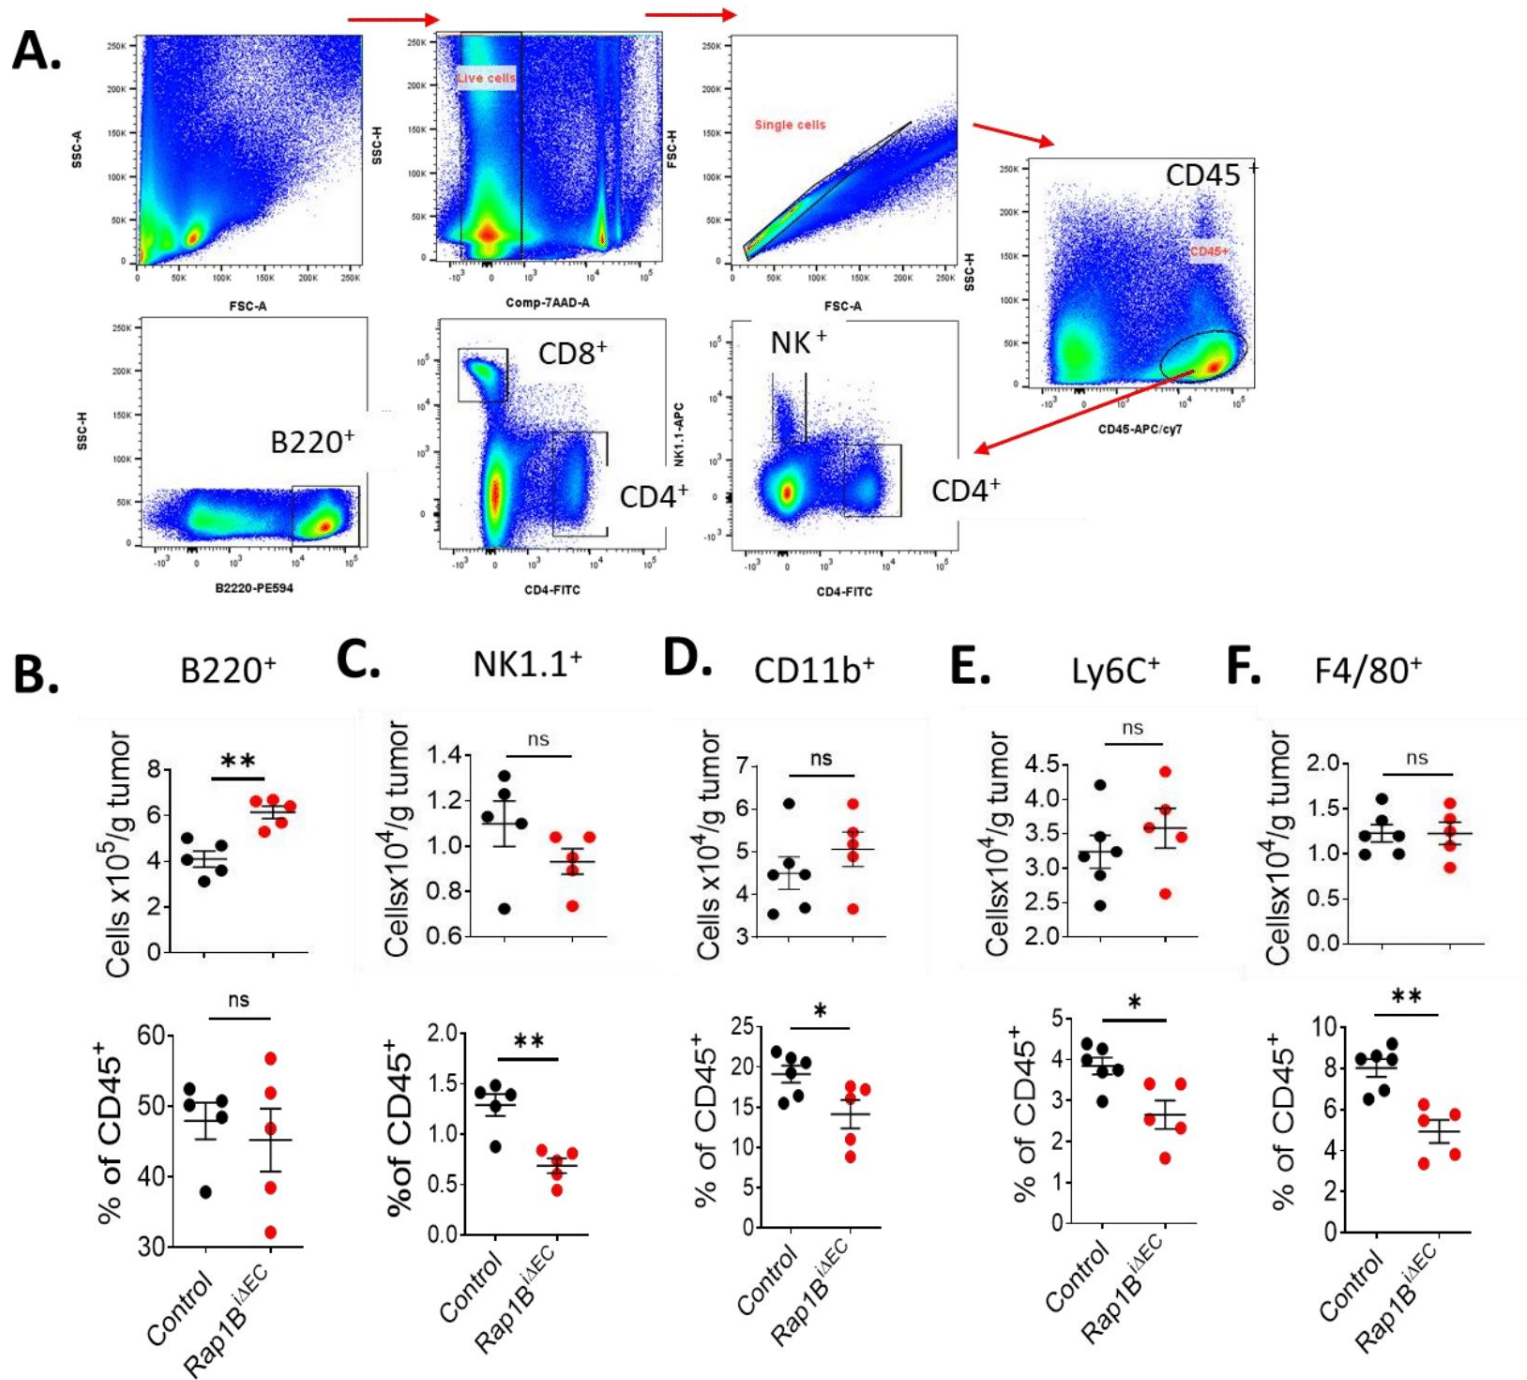

**Figure 2-figure supplement 1. EC-specific Rap1B deletion alters recruitment of tumor-infiltrating lymphocytes (TIL).** (A) Gating and selection of immune cell types from tumor single-cell suspensions. Representative plots from a control tumor are shown. One million events were acquired on BD FACS-diva (LSR II-Green) using single-cell suspension from the harvested tumors. Single cells were used to identify CD45<sup>+</sup> leukocytes, which were further gated using marker-specific antibodies against NK1.1 (natural killer cells), CD4, CD8 and B220 B-cells. **B-F.** Quantitation of cell populations: (B) B cells (B220<sup>+</sup>), (C) natural killer cells (NK1.1<sup>+</sup>), (D) myeloid cells (CD11b<sup>+</sup>), (E) monocytes (Ly6C<sup>+</sup>) and (F) macrophage (F4/80<sup>+</sup>) in single-cell suspension of tumors from Rap1B<sup>ΔIEC</sup> or control mice. Data are presented as the mean ± S.E.M. \*, P < 0.05. n = 5 mice per group, Student's *t* test. Data and statistical outputs are available in *Figure 2–figure supplement 1-source data 1* file.



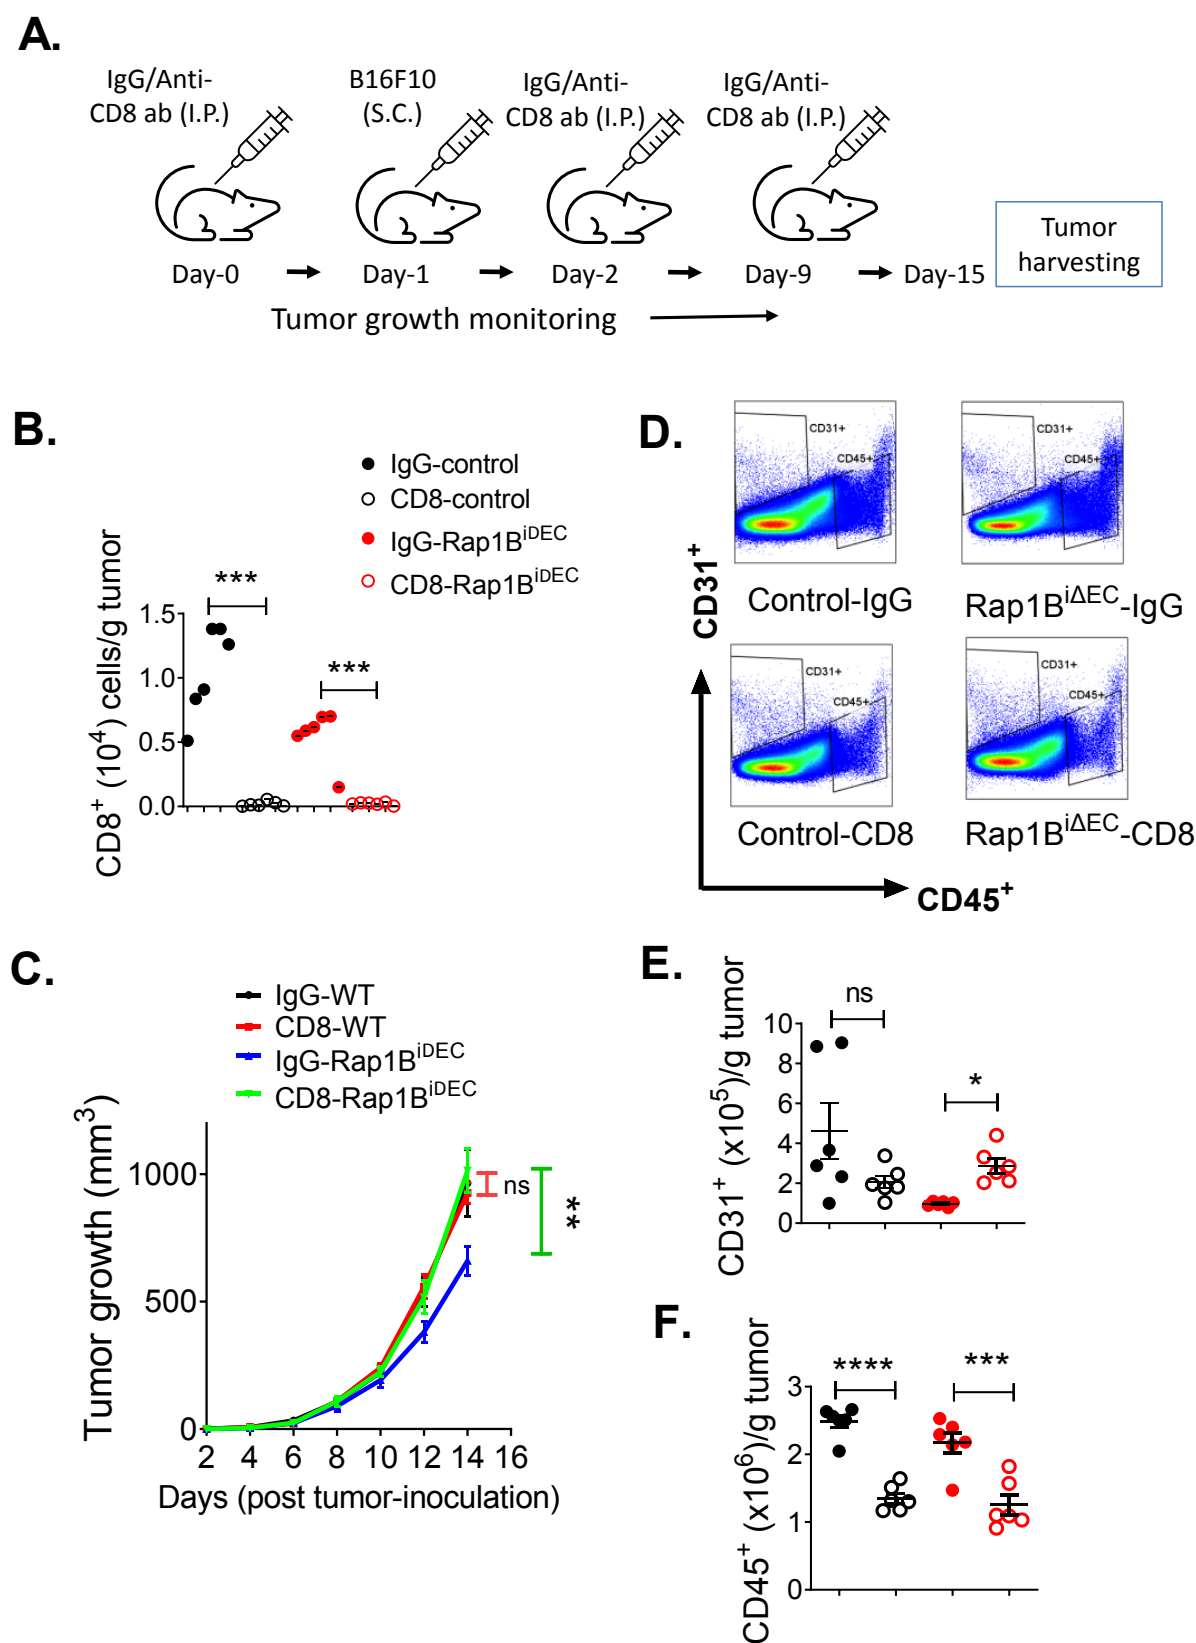

**Figure 3. Depletion of CD8<sup>+</sup> T cells normalizes tumor growth in Rap1B<sup>iDEC</sup> mice.**

(A) Schematic diagram of antibody treatment (intraperitoneal, I.P. injection) and melanoma induction (subcutaneous, S.C. injection). (B)

Quantification of CD8<sup>+</sup> T cells demonstrates highly efficient cell depletion in with anti-CD8 antibody or IgG isotype control. (C) Tumor growth kinetics in Rap1B<sup>iDEC</sup> vs. Cre-negative control treated with anti-CD8. (D) Gating scheme and quantification of CD31<sup>+</sup> ECs (E) and CD45<sup>+</sup> cells (F).

Data are presented as the mean ± S.E.M (n=6 per group). \*, P < 0.05, \*\*, P < 0.01, \*\*\*, P < 0.001, Panels B, C, F: one-way ANOVA with Tukey's post hoc test. Panel E: Student's t-test. Data and statistical outputs are available in *Figure 3-source data 1* file.

● IgG-control ○ CD8-control ● IgG-Rap1B<sup>iΔEC</sup> ○ CD8-Rap1B<sup>iΔEC</sup>

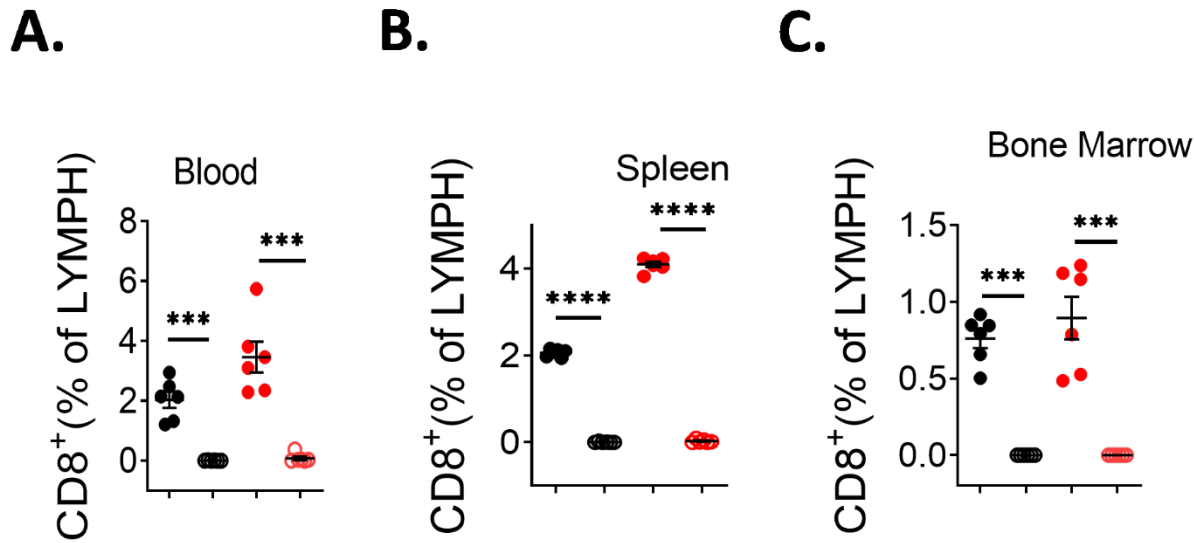

**Figure 3 – figure supplement 1. Efficiency of CD8<sup>+</sup> T cell depletion in specific tissue compartments.**

Peripheral blood cells (A), spleen cells (B) and bone marrow cells (C) were stained with Very CD8 mAb. Flow analysis showing drastic depletion of CD8<sup>+</sup> cells in all tissue compartment. IgG isotype control has no significant modulation on T cell. Data are presented as the mean ± S.E.M. \*\*\*, P < 0.001, \*\*\*\*, P < 0.0001. n = 6 mice per group, one-way ANOVA with Tukey's multiple comparisons post hoc test. Data and statistical outputs are available in *Figure 3 – figure supplement 1-source data 1* file.



● IgG-control ○ CD8-control ● IgG-Rap1B<sup>iΔEC</sup> ○ CD8-Rap1B<sup>iΔEC</sup>

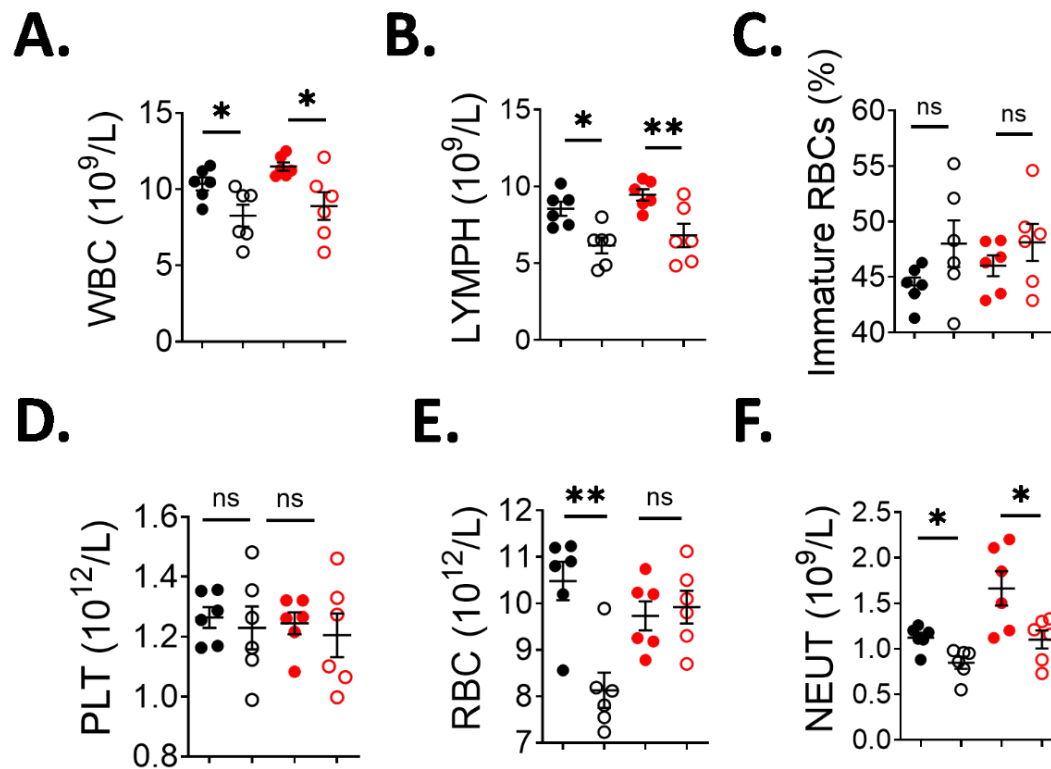

**Figure 3 – figure supplement 2. Hematological (CBC) analysis in control and Rap1B<sup>iΔEC</sup> mice after CD8<sup>+</sup> T cell depletion.** Whole blood (13  $\mu$ l per mouse) was collected into anticoagulant (1:10) using capillary tubes (StatSpin<sup>®</sup> Microhematocrit Tubes, VWR). The blood samples were immediately analyzed using an automated Hematology blood analyzer (Sysmex XN-1000<sup>™</sup>). CBC counts: **(A)** White blood cells (WBC) 10<sup>9</sup>/L; **(B)** lymphocyte (LYMPH) 10<sup>9</sup>/L, **(C)** Immature (young) RBC fraction, as measured by % of high fluorescence reticulocyte (HFR), **(D)** Platelets (PLT) 10<sup>12</sup>/L, **(E)** Red blood cells (RBC) 10<sup>12</sup>/L, and **(F)** Neutrophils (NEUT). Data are presented as the mean  $\pm$  S.E.M. \*, P < 0.05, \*\*, P < 0.01. n = 6 mice per group, one-way ANOVA with Tukey's multiple comparisons post hoc test. Data and statistical outputs are available in *Figure 3 – figure supplement 2-source data 1* file.

● IgG-control ○ CD8-control ● IgG-Rap1B<sup>iΔEC</sup> ○ CD8-Rap1B<sup>iΔEC</sup>

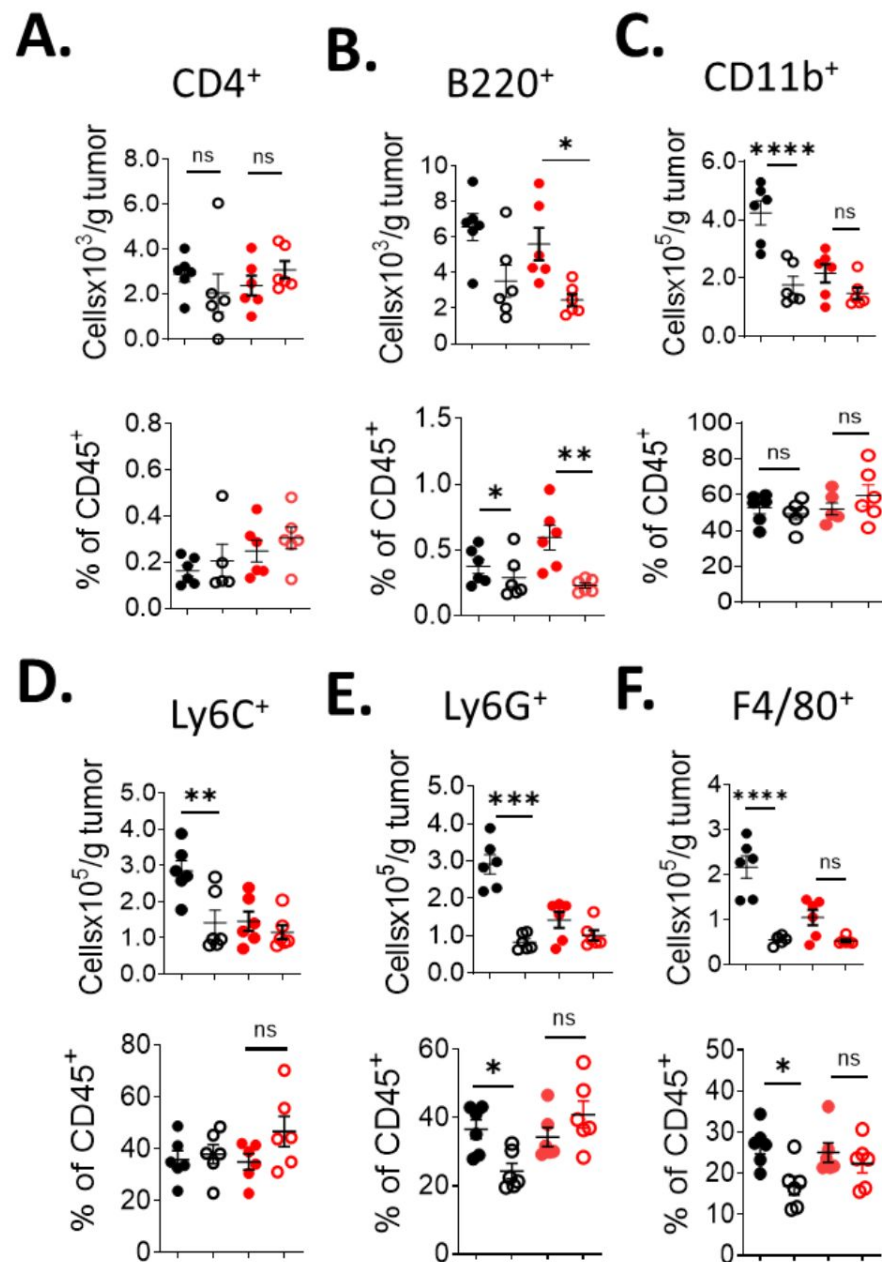

**Figure 3 – figure supplement 3. Effect of CD8<sup>+</sup> T-cell depletion on tumor-infiltrating lymphocytes (TIL) in control and Rap1B<sup>iΔEC</sup> mice.** Immunophenotypic examination showing quantitation of (A) CD4<sup>+</sup>T cells, (B) B cells (B220<sup>+</sup>), (C) myeloid cells (CD11b<sup>+</sup>), (D) monocytes (Ly6C<sup>+</sup>), (E) neutrophils (Ly6G<sup>+</sup>) and (F) macrophage (F4/80<sup>+</sup>) in Rap1B<sup>iΔEC</sup>/control mice treated with either IgG isotope or CD8 mAb. Data are presented as the mean ± S.E.M. \*, P < 0.05, \*\*, P < 0.01. n = 6 mice per group, one-way ANOVA with Tukey's multiple comparisons post hoc test. Data and statistical outputs are available in *Figure 3 – figure supplement 3-source data 1* file.

**A.**

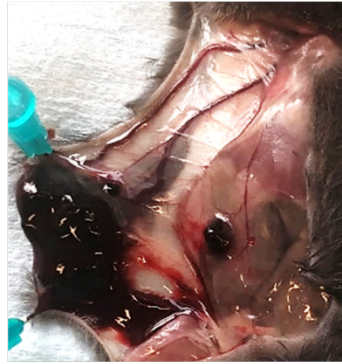

IgG-Control

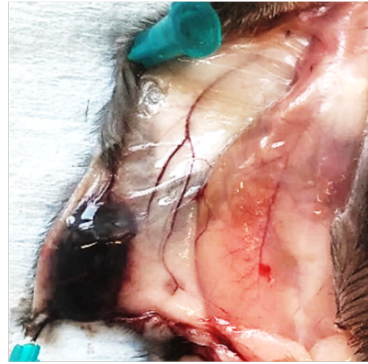

IgG-Rap1B<sup>iΔEC</sup>

**B.**

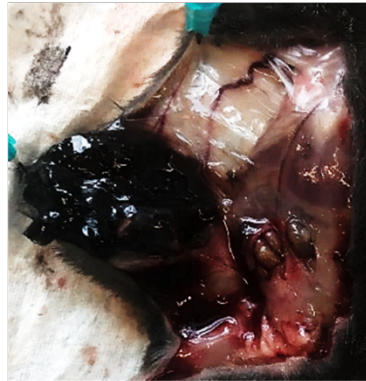

CD8-Control

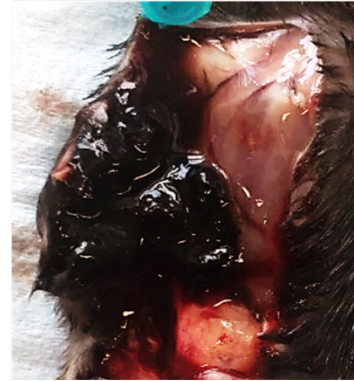

CD8-Rap1B<sup>iΔEC</sup>

**Figure 3 – figure supplement 4. Depletion of CD8<sup>+</sup> T-cells normalizes tumor growth in Rap1B<sup>iΔEC</sup> mice.**

Representative photographs showing pattern of tumor growth in Rap1B<sup>iΔEC</sup>/control mice treated with either IgG isotope or CD8 mAb. **(A)** IgG isotope has no effect on tumor growth in control group. **(B)** CD8<sup>+</sup> T cell depletion significantly rescued tumor reduction in Rap1B<sup>iΔEC</sup> mice group.

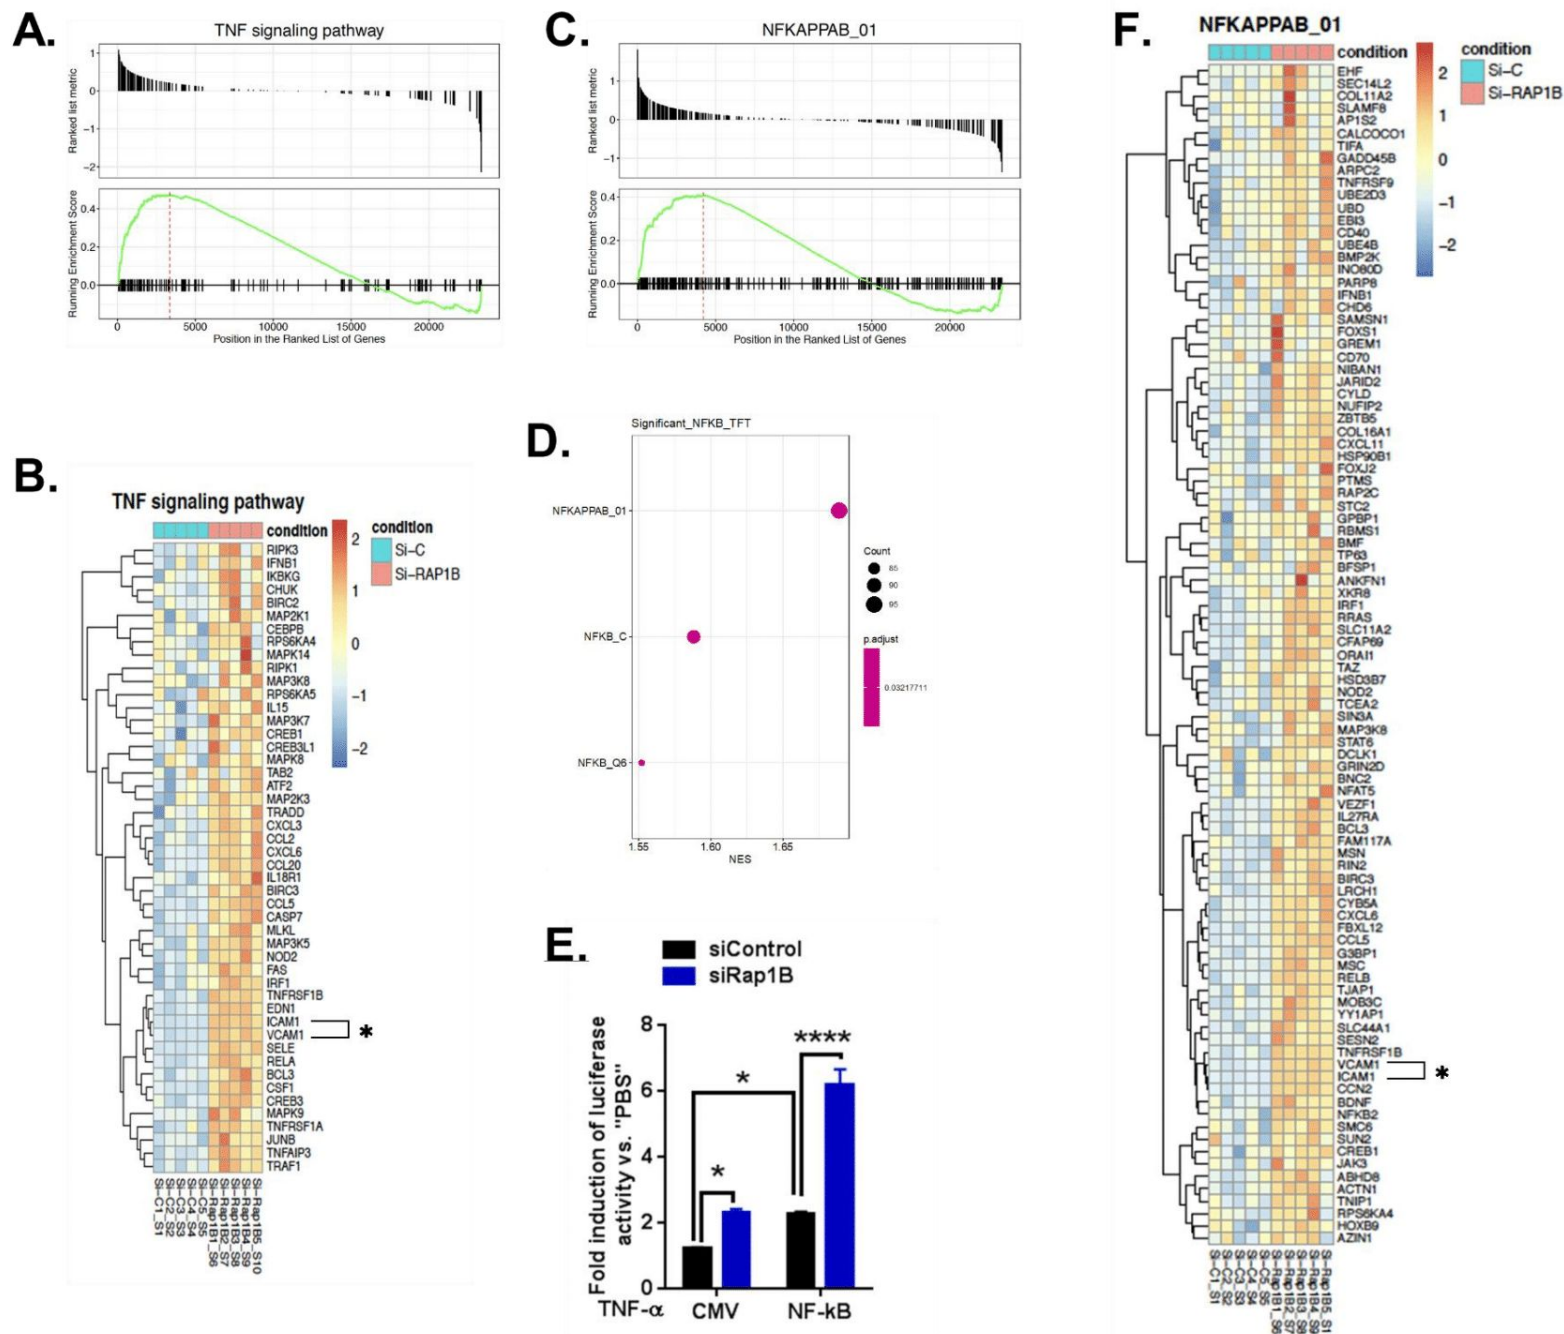

**Figure 4. Endothelial Rap1B restricts TNF- $\alpha$  induced NF $\kappa$ B activation.**

Increased TNF- $\alpha$  signaling and NF $\kappa$ B transcription detected by bulk RNA sequencing of TNF- $\alpha$ -treated siRap1B and siControl Ecs. **(A)** Gene set enrichment analysis (GSEA) of genes in TNF- $\alpha$  signaling pathway upregulated in siRap1B vs. siControl. **(B)** Heatmap of selected genes from TNF- $\alpha$  signaling pathway. **(C)** GSEA of NF $\kappa$ B signaling pathway. **(D)** Transcriptional activation of NF $\kappa$ B in siRap1B ECs. **(E)** TNF- $\alpha$ -induced NF $\kappa$ B activity determined by luciferase assay in cells transfected with NF- $\kappa$ B reporter construct or a control vector (CMV). Values shown as mean fold change vs. PBS-treated cells. Error bars represent mean  $\pm$  SD (n = 6). \*, P < 0.05, \*\*\*\*, P < 0.0005. One-way ANOVA followed by Tukey's multiple comparisons test. **(F)** Heatmap of selected genes from NF $\kappa$ B pathway. (n = 5 separate EC sets per group). Link to sequence data deposited within NCBI GEO is available in *Figure 4-source data 1* file. Data and statistical outputs for panel E are available in *Figure 4-source data 2* file.





**Figure 5. Endothelial Rap1B restricts proinflammatory CAM expression, mediates VEGF signaling.** (A) Top: Densitometry of TNF $\alpha$ -induced VCAM-1 expression, normalized to actin, in siControl- or siRap1B- transfected HUVECs. Bottom: representative Western blot. Original images are available in *Figure 5-source data 1* file. (B, C) VCAM-1 expression in tumor ECs (CD31<sup>+</sup> cells): representative flow cytometry histogram (B) and median fluorescence intensity (MFI) (C). n  $\geq$  5 mice per group, (D, E) EC-Rap1B deficiency leads to increased leukocyte adhesion in vitro. Representative image (D) and quantification (E) of Calcein-AM-labeled Jurkat cells adhering to siRap1B and siControl ECs following TNF- $\alpha$  treatment 12 hours. Adhesion efficiency is expressed as Jurkat cells bound/10,000 plated. (F) VEGF treatment inhibits TNF- $\alpha$ -induced CAM expression in siControl but not in siRap1B ECs. Densitometry (top) and representative Western blot (bottom) are shown. Original images are available in *Figure 5-source data 2* file. Data shown are mean  $\pm$  S.E.M. \*, P < 0.05, \*\*, P < 0.01, \*\*\*, P < 0.001, Panels A, E, F: one-way ANOVA followed by Tukey's multiple comparisons test. Panel C: Student's t-test. Data and statistical outputs are available in *Figure 5-source data 3* file.

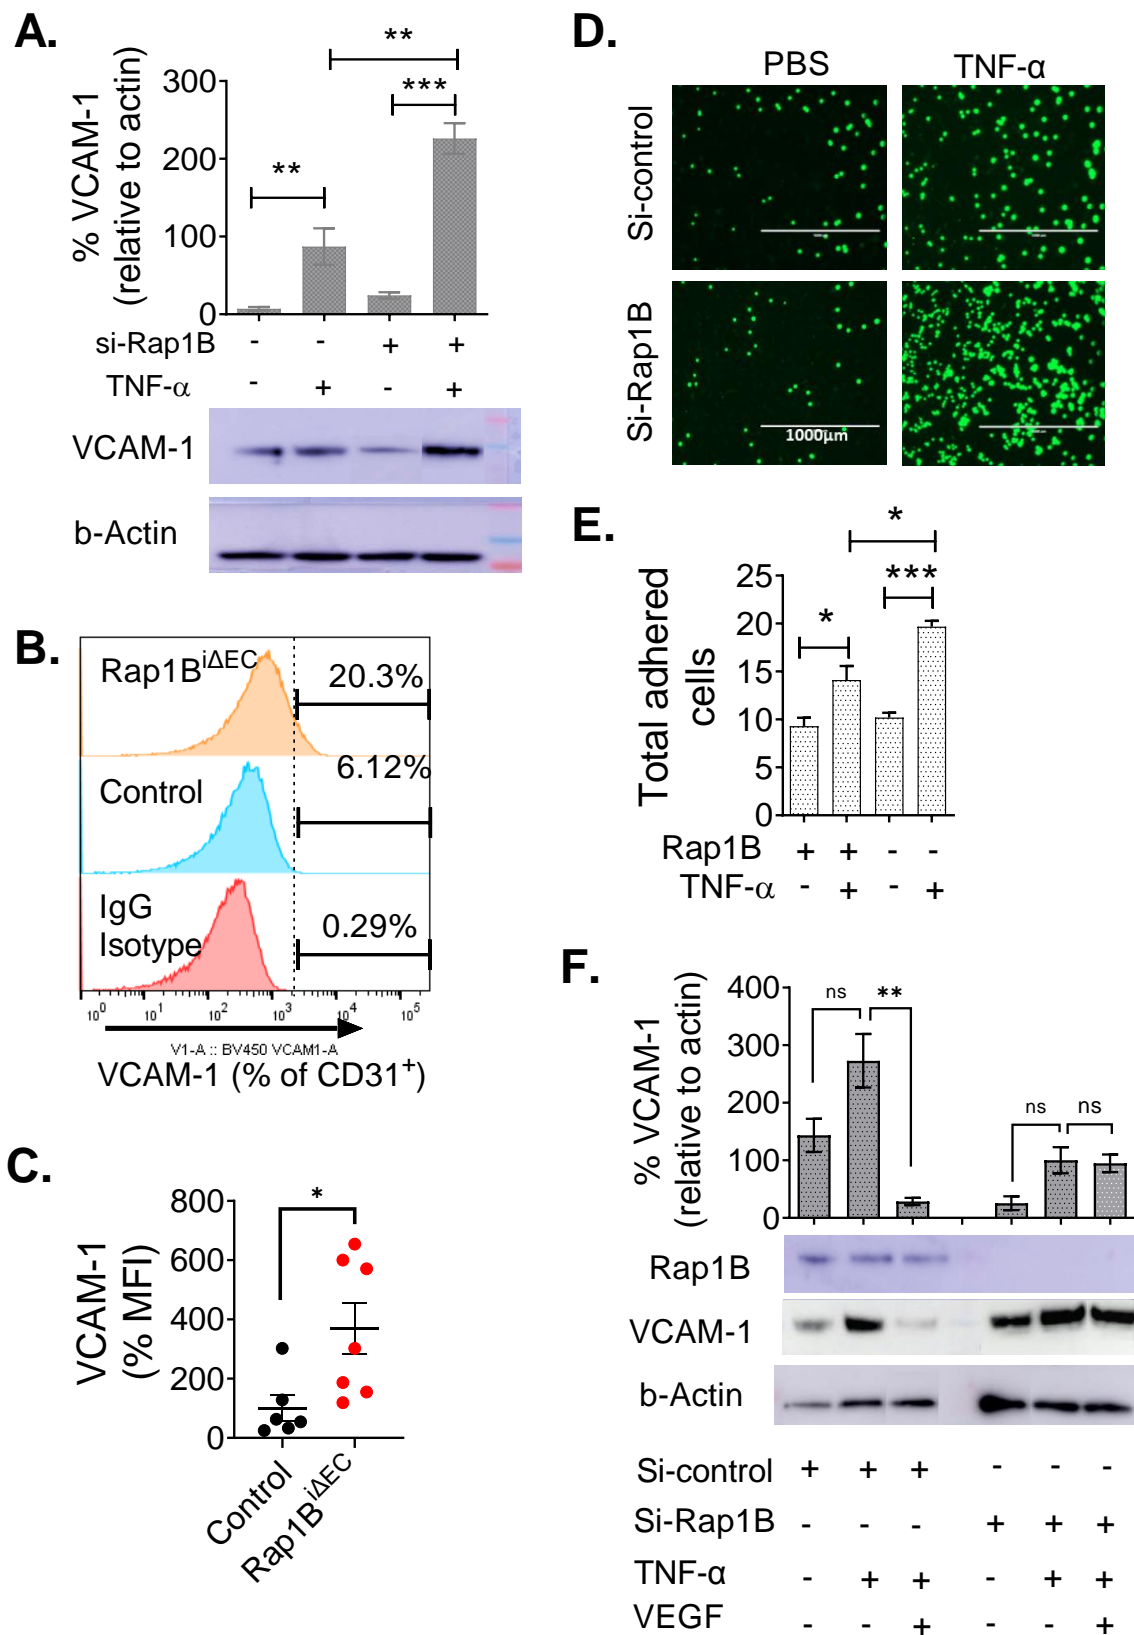



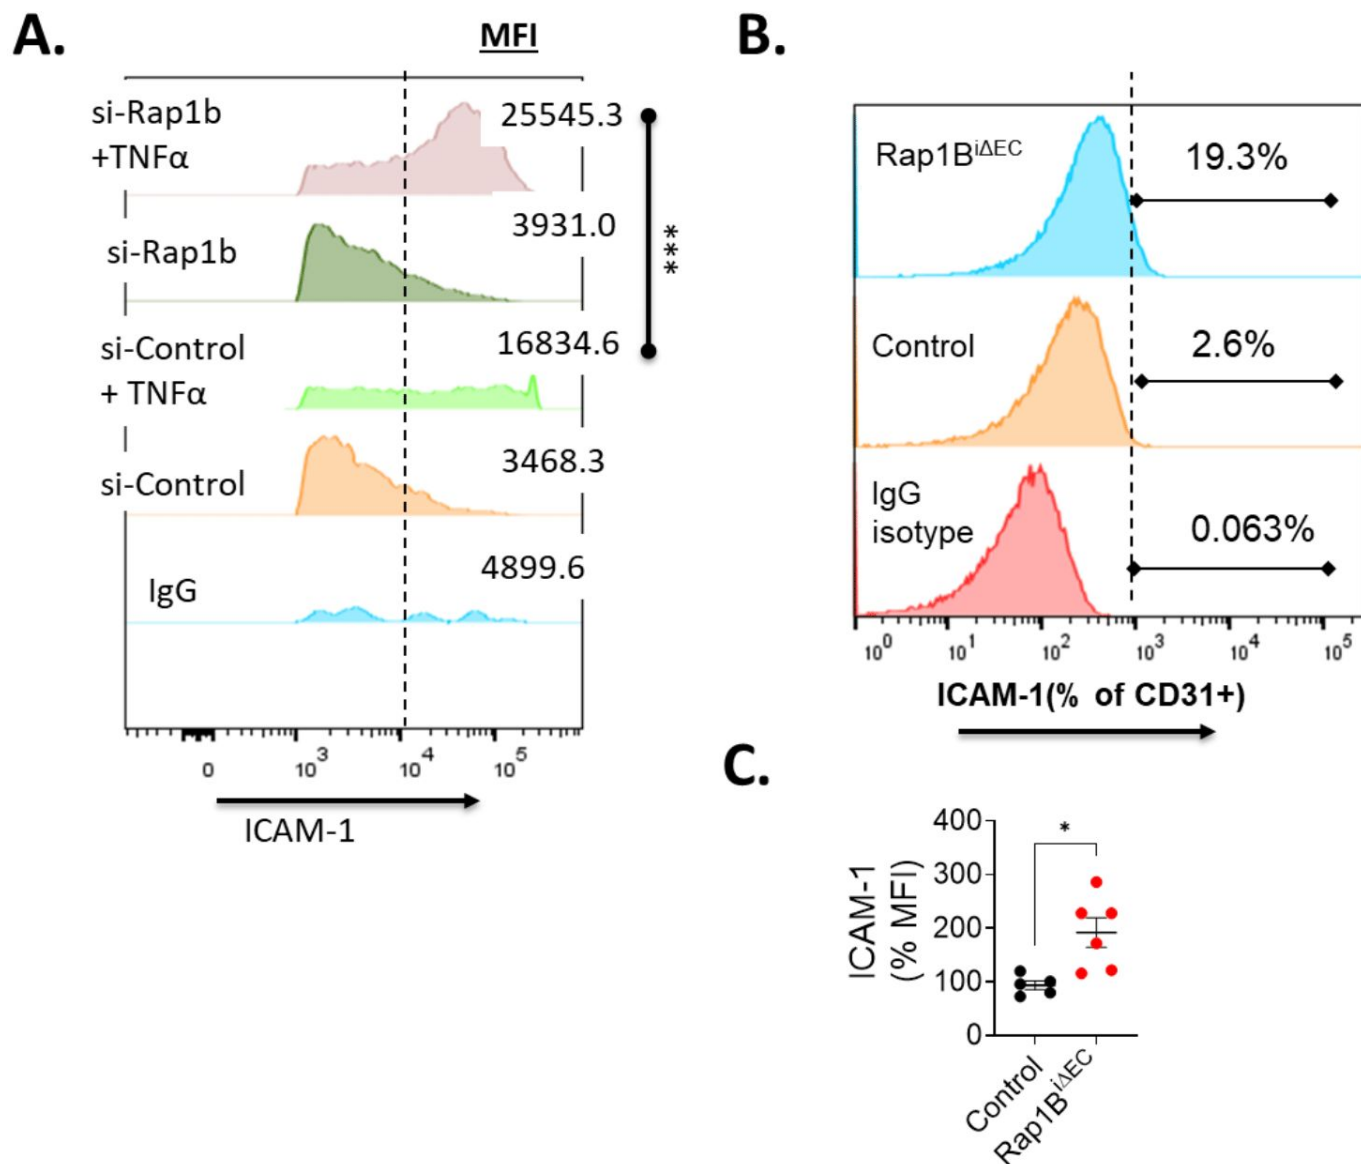

**Figure 5 – figure supplement 1. Elevated ICAM-1 surface expression in Rap1B-deficient tumor ECs and HUVECs. (A)** Flow cytometric analysis of ICAM-1 expression on siRap1B and siControl HUVEC cells. **(B)** Flow cytometric analysis of ICAM-1 expression on tumor ECs from Rap1B<sup>iΔEC</sup> and control mice: representative flow cytometry histogram and median fluorescence intensity (MFI) plot **(C)**. Data are presented as the mean  $\pm$  S.E.M. \*\*,  $P < 0.01$ , Student's t test. Data and statistical outputs are available in *Figure 5 – figure supplement 1-source data 1* file.

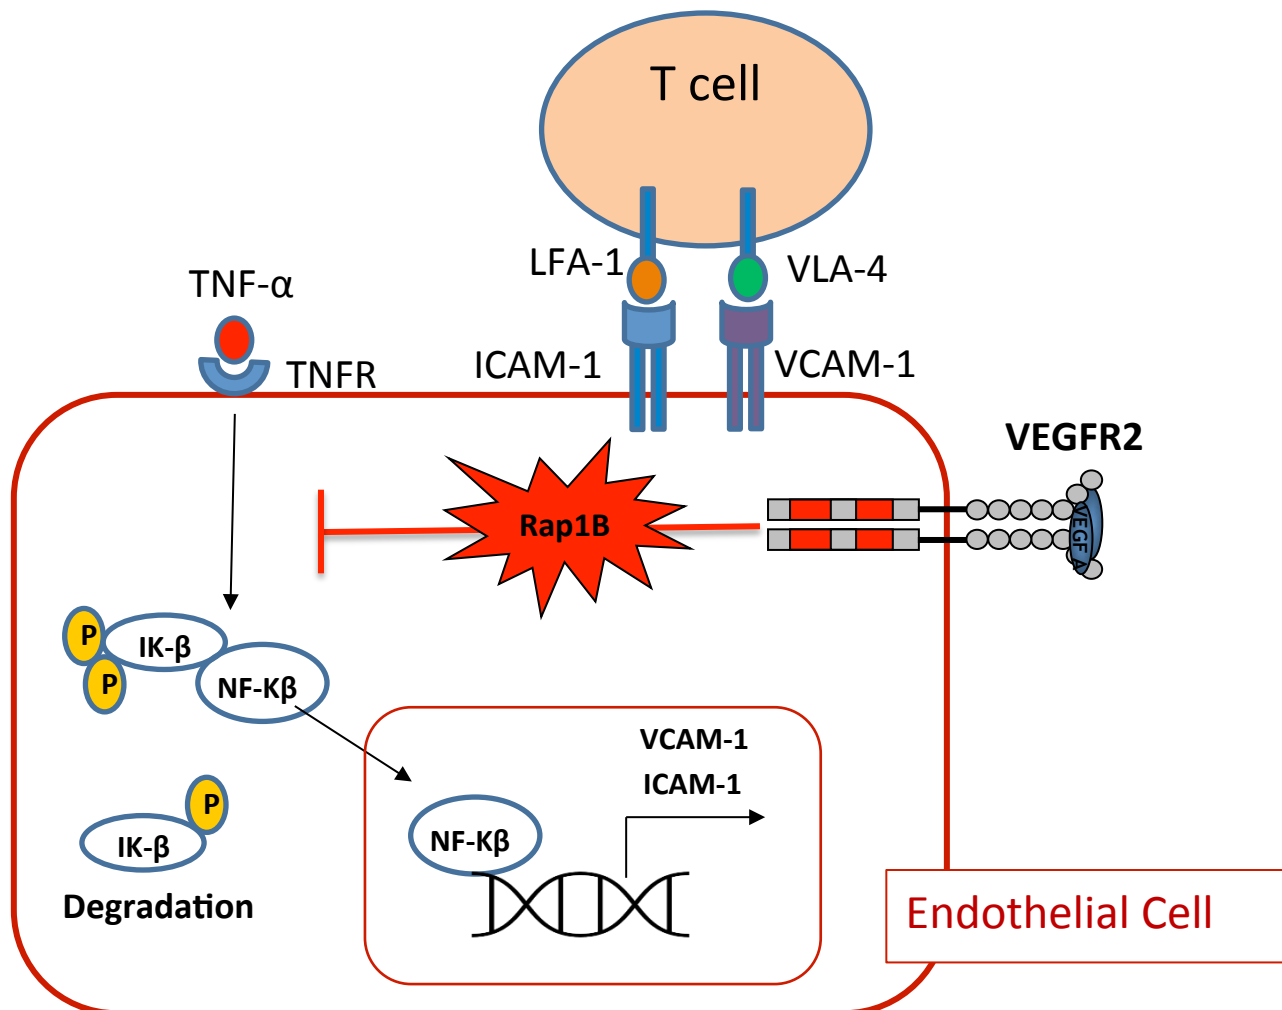

**Figure 6. Endothelial Rap1B conveys VEGF suppression of immune reactivity – proposed mechanism.** Under normal conditions Rap1 suppresses cytokine-induced CAM expression, limiting T-cell adhesion and recruitment. In proangiogenic conditions of TME, VEGF signaling, mediated by Rap1B, suppresses this endothelial immune response.
